# Supplementary material for: A Network-Based Method for Mechanistic Investigation and Neuroprotective Effect on Post-treatment of Senkyunolid-H Against Cerebral Ischemic Stroke in Mouse
Source: Front Neurol. 2019 Dec 19;10:1299. doi: 10.3389/fneur.2019.01299 (PMC6930873; doi:10.3389/fneur.2019.01299)
Supplement: Supplementary file 3 [file Table_3.XLSX]

## Sheet: SEH TARGETS
Topological indices of PPI network for SEH related targets
Node	Degree	BetweennessCentrality	ClosenessCentrality
NTRK1	237	0.106323	0.592937
NOTCH1	207	0.121335	0.558669
EGFR	157	0.0435303	0.549526
TP53	141	0.0277098	0.535684
MSH2	137	0.0417994	0.511218
GRB2	136	0.0312058	0.536134
UBC	125	0.0248091	0.529461
APP	125	0.0534731	0.538851
ESR1	119	0.0169233	0.519544
HSP90AA1	113	0.0187056	0.531667
SRC	104	0.0178924	0.52424
YWHAZ	101	0.0152785	0.517857
BRCA1	100	0.0110902	0.506349
RPA1	100	0.0110181	0.498827
CDC5L	98	0.0105156	0.493808
HCK	96	0.0323889	0.488515
CDK2	95	0.0115181	0.498827
SNW1	94	0.00878401	0.507154
HSP90AB1	93	0.0131818	0.515764
IGF1R	92	0.0396548	0.502362
ABL1	91	0.0160691	0.513688
EP300	89	0.00978396	0.507154
RPA2	87	0.00763008	0.489264
MYC	86	0.0063264	0.493426
PIK3R1	85	0.00807781	0.503155
NPM1	81	0.00701643	0.504348
RNF2	81	0.00793864	0.490392
AR	80	0.00659458	0.493808
HDAC1	78	0.00768475	0.484434
MDM2	78	0.00931773	0.51245
SHC1	77	0.00715708	0.502758
PRKDC	77	0.00829422	0.507154
SIRT7	77	0.00717227	0.471545
CTNNB1	76	0.0106616	0.5104
EWSR1	74	0.00852672	0.489264
CBL	74	0.00991896	0.509992
CCDC8	72	0.00567623	0.481146
ALK	72	0.0246689	0.450247
SMAD3	71	0.00486721	0.498827
PCNA	71	0.00776194	0.484802
ACTB	69	0.00707521	0.492664
XRCC6	67	0.00449308	0.500392
RPA3	67	0.00242464	0.468773
CREBBP	67	0.00677837	0.484802
ERBB2	67	0.00670029	0.468429
YWHAG	66	0.00604353	0.496112
FBXO6	65	0.00783839	0.471545
CRK	64	0.00438107	0.483333
MAPK1	63	0.00549157	0.499608
ARRB2	63	0.00475599	0.474702
AKT1	63	0.00529249	0.501178
CAND1	62	0.00422324	0.48006
U2AF2	62	0.00353227	0.474349
HNRNPK	61	0.00324682	0.488141
LCK	60	0.00558617	0.470155
STAT3	57	0.00446237	0.495727
RELA	57	0.00472689	0.487395
INSR	56	0.00590097	0.465354
XRCC5	56	0.00290537	0.475056
NCL	56	0.00345533	0.484434
RPS27A	55	0.00440064	0.492284
SMURF1	54	0.00354664	0.465015
RB1	54	0.00549005	0.487023
TRIM28	54	0.00442147	0.482967
YWHAE	54	0.00345934	0.479699
IKBKG	54	0.00424323	0.475056
PLCG1	54	0.00267125	0.472593
PARP1	54	0.00263385	0.488889
CUL2	54	0.00328603	0.467399
PPP2CA	53	0.00349042	0.488889
PTPN11	53	0.0024243	0.462654
H2AFX	52	0.00376031	0.472243
VIM	51	0.0042687	0.48591
MSH6	51	0.00233919	0.455064
ATM	51	0.00341734	0.476475
GSK3B	51	0.00784737	0.483333
CDKN1A	51	0.00300242	0.472593
KAT5	50	0.00425561	0.48006
YWHAB	50	0.00331647	0.484802
PTK2	50	0.00400302	0.484802
MYH9	49	0.00329226	0.479699
IRS1	49	0.00189458	0.482602
ARRB1	49	0.00253808	0.495727
SMARCAD1	49	0.00211572	0.450883
CUL5	49	0.00310061	0.463326
USP7	48	0.00252195	0.482602
RUVBL1	48	0.00325796	0.479339
DDX17	47	0.00143231	0.490015
MET	47	0.00207721	0.449612
SUMO2	47	0.00291927	0.451841
SH3KBP1	46	0.00297573	0.454093
PIN1	46	0.0056263	0.478261
PPP2R1A	45	0.00283483	0.482237
CRKL	45	0.00386907	0.467057
KHDRBS1	45	0.0020582	0.472593
RACK1	44	0.00664063	0.471545
ERBB3	44	0.00138872	0.445842
PXN	43	0.00225524	0.454416
KPNB1	43	0.00223367	0.478979
CDK9	43	0.00168303	0.453447
HNRNPH1	43	0.00223144	0.469463
CAV1	43	0.0026022	0.479339
RASA1	42	0.00256919	0.478261
PIK3R2	42	0.00135967	0.47541
HIF1A	42	0.00178049	0.470501
ATR	42	0.00252932	0.459654
HSPD1	41	0.00332141	0.48006
DHX15	41	0.00148648	0.476119
SMARCA4	40	0.00169213	0.474702
RAD21	40	0.00191992	0.454416
PRKCA	40	0.00172462	0.473294
BCR	40	0.00143246	0.468773
HDAC6	40	0.00245662	0.472243
TUBB4B	40	0.00236884	0.473645
KDM1A	40	0.00236084	0.469809
MLH1	40	0.00258509	0.445842
MAP3K3	40	0.00161435	0.451522
NEDD4	40	0.00200115	0.465015
BARD1	39	0.00132205	0.447092
JAK2	39	0.00142269	0.449612
PRKCD	39	0.00468953	0.48591
SF3B3	39	0.00114248	0.463326
SMC1A	39	0.0010086	0.475764
HNRNPD	39	0.00121176	0.464
ANXA6	39	0.00834294	0.449612
CHEK1	38	0.0011423	0.456366
SMC3	38	0.00183255	0.469809
MRE11A	38	0.000725	0.452482
NBN	37	0.0011967	0.434901
SMAD1	36	0.00215429	0.459654
JAK1	36	0.00236518	0.46299
RPLP0	36	0.000556	0.46299
NEDD8	36	0.00277982	0.443672
KIT	36	0.000762	0.408189
MAP3K1	36	0.00179208	0.46065
SMARCA5	36	0.00109681	0.470155
VAV1	35	0.00160172	0.46299
CCT3	35	0.00129372	0.476475
CCT8	35	0.00166607	0.478261
PAXIP1	35	0.00241012	0.435495
SIRT6	35	0.000838	0.42963
ACTA1	34	0.00482399	0.462654
CHD4	34	0.00159636	0.456366
BTK	34	0.00170213	0.451202
RAD50	34	0.000625	0.454093
MCM5	34	0.000754	0.471893
SMARCC2	33	0.000667	0.468085
RBBP4	33	0.00144475	0.464676
GAB1	33	0.000679	0.44522
HGS	33	0.00227655	0.473645
ILK	33	0.00108164	0.457676
PTPRJ	33	0.0031208	0.451841
PTPN1	33	0.00231841	0.46299
HIBCH	33	0.0103525	0.39726
PIK3R3	33	0.00136874	0.438488
IRS4	33	0.00148532	0.463663
FBXW7	32	0.00362792	0.450883
MCM3	32	0.00144364	0.464338
SMARCC1	31	0.000712	0.465354
PRPF8	31	0.000457	0.464338
BLM	31	0.00043	0.444599
ITCH	31	0.00135928	0.464
NFKB1	31	0.00133337	0.45702
OTUB1	31	0.00153588	0.461316
YY1	31	0.000821	0.458993
PTBP1	31	0.000665	0.469118
CCT6A	31	0.00283497	0.465693
SUPT16H	31	0.000565	0.446466
RAD51	30	0.0018115	0.441522
TSG101	30	0.00212209	0.456366
RBPJ	30	0.00140802	0.436687
RPL10	30	0.0010015	0.44522
CSK	30	0.000866	0.446154
KAT2B	30	0.000626	0.449612
MCC	30	0.00192646	0.44522
IFI16	30	0.0021275	0.447405
JUP	29	0.00182588	0.455714
PRKCZ	29	0.000675	0.449612
PRPF19	29	0.000536	0.456693
SOCS1	29	0.000833	0.439697
SOS1	29	0.000311	0.450565
FHL2	29	0.001817	0.451522
CDC27	29	0.00174566	0.470501
SOCS3	29	0.00135311	0.443056
PIK3CA	28	0.00230013	0.465693
RFC4	28	0.00073	0.467057
HRAS	28	0.00169206	0.44429
MAP3K5	28	0.00122151	0.447405
RFC1	28	0.00054	0.458663
SRSF5	27	0.000631	0.440608
ITGB1	27	0.00163267	0.448349
INPP5D	27	0.00101971	0.396027
MMS19	27	0.00177864	0.456366
ABL2	27	0.000447	0.449929
IRS2	27	0.000304	0.446779
APBB1	27	0.00182143	0.456693
SNCA	27	0.00251765	0.451522
NOTCH2	27	0.00262945	0.410818
PRPF6	27	0.000365	0.454416
HMGB1	27	0.00166763	0.450565
PIAS4	27	0.000779	0.420013
PLCG2	27	0.000286	0.430499
SUPT5H	27	0.00145986	0.444599
SMN2	26	0.000586	0.43079
SMN1	26	0.000586	0.43079
SRSF7	26	0.000463	0.446466
DNM2	26	0.00108831	0.464676
RPS5	26	0.000315	0.446154
TNK2	26	0.00140343	0.46299
RPL11	26	0.000536	0.448349
KRT18	26	0.000894	0.446466
PHB2	26	0.000873	0.448664
SNAI1	26	0.0015835	0.449296
MYH10	25	0.000582	0.445531
MED23	25	0.00154115	0.450247
ABI1	25	0.00136883	0.408451
PAK2	25	0.000665	0.462319
CHEK2	25	0.00250283	0.434605
BCAR1	25	0.00058	0.431664
TGFBR1	24	0.000646	0.444909
DOK1	24	0.000142	0.412411
AIRE	24	0.000772	0.442748
PDCD6IP	24	0.00137172	0.448664
USP11	24	0.000593	0.446779
TMEM17	24	0.00180718	0.426186
REV1	23	0.00237483	0.426756
RAB7A	23	0.00157222	0.446154
FANCA	23	0.00120159	0.441828
FANCD2	23	0.00065	0.435198
LATS2	23	0.000779	0.447719
HNRNPH2	23	0.000927	0.419737
WAS	22	0.000652	0.414286
KAT2A	22	0.000655	0.435792
SART1	22	0.000414	0.460317
PPP2CB	22	0.00081	0.449296
RANBP9	22	0.000716	0.462319
TAB1	22	0.000888	0.455064
MUC1	22	0.00306841	0.440608
GNAI2	22	0.00152316	0.428188
FAF2	21	0.00126453	0.436687
ARHGEF2	21	0.000418	0.460317
RPS24	21	0.000131	0.428763
GRB10	21	0.000214	0.428475
IK	21	0.000335	0.451522
NOTCH3	21	0.0021055	0.440912
USP15	21	0.000454	0.447405
TOP2B	21	0.000535	0.45604
ESR2	21	0.00101704	0.436389
MSH3	21	0.000382	0.422797
PMS2	21	0.000494	0.418361
EIF4B	20	0.0006	0.430499
NME1-NME2	20	0.00113806	0.408189
MGMT	20	8.75e-05	0.426471
NME2	20	0.00113806	0.408189
XPA	20	0.000704	0.417813
PSEN1	20	0.00179477	0.443363
CD2AP	20	0.00120124	0.422517
NEDD4L	20	0.000691	0.453125
ACTA2	19	0.00047	0.425901
PPP2R2A	19	0.000756	0.461316
PSME3	19	0.00318654	0.414017
EIF3F	19	0.000885	0.46165
RNF126	19	0.000347	0.430499
CD4	19	0.000319	0.408712
ACTC1	18	0.000466	0.405337
RAD9A	18	0.000276	0.412945
HCFC1	18	0.000647	0.454093
JAK3	18	0.000211	0.391892
ATP6V1B2	18	0.000405	0.433719
PRKAA1	18	0.00105598	0.45604
IL6ST	18	0.00068	0.40227
RBM10	18	0.000214	0.441217
FEN1	18	0.000472	0.439092
ANAPC1	18	0.000501	0.436687
FLT1	18	0.00018	0.407407
MAX	18	0.000267	0.419461
ACTN4	17	0.000283	0.439697
SRSF11	17	9.47e-05	0.429919
RNF40	17	0.00120066	0.451202
PDS5A	17	0.000706	0.454093
ANAPC7	17	0.000298	0.424202
RBM25	17	0.000173	0.431664
CLIC4	17	0.00164228	0.429341
IPO5	17	0.000806	0.451522
KRT40	17	0.000679	0.400502
PPP6R3	17	0.000523	0.441217
RIF1	17	0.000632	0.438187
CORO1C	17	0.00035	0.425901
PMS1	17	0.00108466	0.423639
REL	17	0.0011813	0.436986
MYO6	16	0.000357	0.435495
GC	16	0.00174306	0.382265
PIK3CB	16	0.000376	0.440304
CLK1	16	0.00128084	0.391411
ST13	16	0.000447	0.432249
XIAP	16	0.000307	0.430499
FLII	16	0.00025	0.431373
LCP2	16	0.000251	0.423358
VAV3	16	0.000146	0.417266
PTPRB	16	0.000712	0.432542
TJP1	16	0.000485	0.444909
MTA3	16	0.00042	0.423639
C14orf166	16	0.00026	0.442748
NELFB	16	0.000152	0.443056
HLTF	15	0.000163	0.442134
RAD17	15	0.000566	0.381807
MAML1	15	0.000272	0.399249
DSTN	15	0.000501	0.392857
FRS3	15	0.000443	0.423358
UNC119	15	0.000471	0.39726
LRIF1	15	0.000276	0.391411
NUMB	15	0.000638	0.442748
SOD1	15	0.000913	0.394314
HUS1	15	0.000645	0.404053
TUBGCP2	15	0.000374	0.439697
ROCK1	15	0.000406	0.441828
SEC23A	15	0.000251	0.427328
TRIM25	15	0.000333	0.416721
TPT1	15	0.000374	0.436687
MED28	15	0.000333	0.395291
ERRFI1	15	0.000223	0.421679
STK38	15	0.000447	0.426471
FANCI	15	0.000525	0.426186
ANXA7	15	0.000526	0.421122
CDC73	15	0.000468	0.432542
POLH	15	0.000393	0.421122
EEA1	14	0.000525	0.416177
DVL1	14	0.000311	0.406111
ANAPC5	14	0.000142	0.407407
PPME1	14	0.000172	0.414555
PRKCQ	14	0.000181	0.397756
GRB7	14	0.000318	0.426186
CDC23	14	0.000215	0.407928
A2M	14	0.000841	0.418087
ARF6	14	0.000259	0.427614
FASLG	14	0.000282	0.390692
WIZ	14	0.00105026	0.414824
SRSF10	14	9.82e-05	0.424202
RING1	14	0.000153	0.437886
TK1	14	0.000287	0.42392
XPO5	14	0.000512	0.445531
MAP2K7	14	0.000198	0.405337
SRRT	14	0.0003	0.450883
DTL	14	8.49e-05	0.408712
ASAP1	14	0.000108	0.435495
SMCHD1	14	0.000355	0.43313
RUNX1	14	0.000167	0.406369
PECAM1	13	9.12e-05	0.395782
LEF1	13	0.000332	0.442441
EXO1	13	9.8e-05	0.395291
IKZF3	13	0.000428	0.430209
SEPT9	13	9.55e-05	0.439092
ATRIP	13	6.92e-05	0.395782
BAP1	13	0.000309	0.407407
CDK13	13	0.000168	0.426186
CSF2RB	13	9.67e-05	0.390931
CSF3R	13	0.000117	0.407407
WWTR1	13	0.000276	0.412678
DOK4	13	0.000347	0.407147
EPN1	13	0.000647	0.445842
RAB5A	13	0.0007	0.410818
TNPO1	13	0.000182	0.455714
TBL1XR1	13	8.42e-05	0.436687
PTN	13	0.000372	0.39652
TRIM32	13	0.000209	0.431373
GOT1	13	0.000929	0.374853
IDH1	13	0.000616	0.396027
TRIP13	13	0.00102179	0.4214
TXN2	12	0.00044	0.377292
CLIC1	12	0.000355	0.412678
MDN1	12	0.000217	0.423077
PPP6R1	12	0.000342	0.441828
WWP1	12	0.000117	0.427042
PRKD1	12	5.18e-05	0.421122
RHOU	12	0.000877	0.386667
ARIH2	12	0.000278	0.443981
PHF8	12	0.000186	0.404309
PTPRG	12	0.000121	0.421122
DOK2	12	2.66e-05	0.398999
SHC3	12	0.000246	0.442748
SLX4	12	0.00017	0.408974
PSEN2	12	0.00228501	0.411082
WDR6	12	0.000242	0.449612
PTP4A3	12	0.000141	0.386199
PLS3	12	0.000485	0.437286
MYLK	11	0.000194	0.403542
LOC100996763	11	0.000157	0.37007
SMAD9	11	0.000252	0.402016
IKZF1	11	0.000293	0.402524
UBE2H	11	0.000728	0.382953
LRP2	11	0.000691	0.391171
IRF7	11	0.000189	0.402524
ATP4A	11	0.00113971	0.358226
NOTCH2NL	11	0.000157	0.37007
GRB14	11	0.000158	0.414824
RAPGEF1	11	7.91e-06	0.401006
AARS	11	0.000893	0.420844
EIF3B	11	0.000109	0.420844
POLDIP2	11	0.000444	0.417266
SH2B1	11	5.45e-05	0.427328
MAD2L2	11	0.000404	0.348253
MUTYH	11	0.000198	0.382036
FDPS	11	0.000534	0.410026
MTNR1B	11	0.000255	0.373099
PTPRZ1	11	0.000398	0.383183
CNOT1	11	0.000128	0.440912
ERH	11	0.000213	0.427614
HPRT1	11	0.000429	0.366667
GATAD2B	11	8.7e-05	0.425333
RUNX3	11	5.29e-05	0.411613
RECQL	11	6.87e-05	0.421122
WIPF1	10	0.000157	0.384337
TIPRL	10	0.000383	0.428763
MTUS2	10	0.000249	0.393827
DTX1	10	0.000328	0.425333
EVL	10	0.000115	0.392374
VPS11	10	0.000325	0.422237
EHD1	10	0.000272	0.423639
GIPC1	10	0.000328	0.416177
RPA4	10	9.73e-05	0.396766
POLD3	10	0.000231	0.387136
CEP19	10	0.00018	0.390214
RAD1	10	2.61e-05	0.369427
MOB1A	10	0.000246	0.402524
DHX8	10	8.41e-05	0.423358
SOCS2	10	0.000216	0.377515
ADAM17	10	0.000532	0.427042
CRTC1	10	0.000123	0.403542
GAK	9	0.000167	0.425901
UMPS	9	0.00056	0.39875
E2F3	9	3.49e-05	0.387842
SLFN11	9	7.26e-05	0.431081
ANKRD44	9	0.000196	0.419461
OLIG1	9	0.000311	0.374853
STX17	9	0.00034	0.405594
POLL	9	0.000264	0.405594
ADAM15	9	0.00043	0.398004
HTATSF1	9	0.000177	0.424484
WDR12	9	0.000208	0.398252
IGFBP3	9	0.000411	0.393342
EPHB2	9	3.1e-05	0.382953
NOV	9	0.00111226	0.396273
MAPK8IP3	9	0.000144	0.416993
FBP1	9	8.18e-05	0.393342
KIF2A	9	0.000722	0.421958
GALNT12	9	0.00310772	0.406111
THOP1	9	0.00037	0.407407
PBRM1	9	7.08e-05	0.410553
CCND3	9	0.000279	0.395536
GPS1	9	0.000242	0.433719
MAP4K5	9	3.95e-05	0.416721
KIF3A	9	0.00011	0.450883
JAG1	9	0.000138	0.384337
PLAUR	9	0.00171982	0.377069
ZMIZ1	9	5.72e-05	0.417539
LYPD3	8	0.000658	0.373099
PIK3CG	8	0.000187	0.408451
DNAJC9	8	4.02e-05	0.406888
DPYSL3	8	4.89e-06	0.408974
RAB35	8	0.000348	0.40227
ACADVL	8	0.00174325	0.395291
CIAPIN1	8	0.00014	0.377962
NRDC	8	0.000151	0.415906
HIF1AN	8	0.00019	0.388078
METTL18	8	4.68e-05	0.375073
DLL1	8	8.6e-05	0.374194
THRSP	8	4.79e-05	0.378635
CAB39	8	0.000183	0.363948
TCF12	8	9.68e-05	0.4214
MAP3K4	8	7.64e-05	0.395782
TAGLN	8	0.000119	0.36374
KRTAP10-9	8	7.73e-05	0.364363
KRTAP10-11	8	7.73e-05	0.364363
ADSS	8	8.07e-05	0.343565
MED25	8	9.31e-05	0.414286
WRAP73	8	0.000153	0.37841
CAMK4	7	4.94e-05	0.406111
CCDC180	7	4.32e-05	0.39407
ARIH1	7	0.000169	0.398252
FAAP20	7	5.41e-05	0.370499
HCLS1	7	0.00022	0.414824
ALDH7A1	7	0.000371	0.376846
GOPC	7	0.000198	0.382036
USP12	7	5.47e-05	0.429052
GFI1B	7	0.000152	0.396766
ASCC3	7	3.1e-05	0.416449
NAT2	7	0.000156	0.388314
RND3	7	6.77e-05	0.395291
FH	7	0.000247	0.39407
KLK5	7	0.000195	0.382723
FCGR2A	7	8.06e-05	0.368786
ERCC4	7	7.88e-05	0.39726
ERCC1	7	0.000122	0.41348
UBASH3A	7	0.000113	0.399749
SKAP2	7	5.04e-05	0.397013
SYVN1	7	0.000505	0.400251
MAML2	7	1.74e-05	0.385033
C12orf10	7	0.000168	0.363948
VPS39	7	0.000137	0.424202
ARMC8	6	4.38e-05	0.407147
PPA2	6	0.000244	0.337924
TBCB	6	9.98e-05	0.395536
POLK	6	5.92e-06	0.3673
ZW10	6	0.000121	0.432249
JAG2	6	4.02e-05	0.371362
FBP2	6	3.73e-05	0.387371
INS	6	0.000136	0.379762
AGK	6	6.6e-05	0.408451
IL13RA2	6	8.61e-05	0.370499
ACADM	6	0.000193	0.40227
SPRR2A	6	0.000212	0.386667
NAMPT	6	1.79e-05	0.392374
FRYL	6	5.84e-05	0.39652
RFX1	6	5.95e-05	0.396027
FCGR1A	6	0.00029	0.362294
PDE3A	6	1.96e-05	0.386432
CENPF	6	5.39e-05	0.381579
TPP2	6	1.54e-05	0.402778
POLE3	6	0.000103	0.376401
S100B	6	4.19e-05	0.377069
VPS45	6	0.00011	0.398252
TREX1	6	1.03e-06	0.375736
SOCS5	6	7.59e-05	0.406888
SH3BP1	6	4.32e-05	0.368573
POLI	6	8.87e-05	0.385732
TRPV4	6	0.000145	0.377069
ALOX5	6	3.24e-05	0.397756
UFM1	6	0.000374	0.343195
MDK	6	0.000103	0.359234
ZC3HC1	6	0.000116	0.39652
GNAI1	6	0.000116	0.371146
MAML3	6	5.09e-05	0.375073
BCL11B	5	1.06e-05	0.382953
SERF2-C15ORF63	5	8.22e-05	0.380896
LIMK2	5	7.87e-05	0.396766
ZNF510	5	2.73e-05	0.397508
EGFL7	5	0.000176	0.370499
OXLD1	5	0.000144	0.312592
IKZF2	5	1.81e-06	0.375515
DOK5	5	0.00015	0.374633
C3	5	0.00012	0.359032
POFUT1	5	9.94e-05	0.384337
EPHA1	5	7.66e-06	0.37093
SNAP29	5	5.89e-05	0.364571
HYPK	5	8.22e-05	0.380896
LRCH1	5	4.65e-05	0.415635
MTAP	5	4.94e-05	0.324352
PTBP3	5	0.000143	0.405079
TPD52	5	7.56e-05	0.356624
C2orf44	5	0.000109	0.361473
ZBTB2	5	1.68e-05	0.4
RANBP10	5	3.19e-05	0.389262
LSM12	5	6.74e-05	0.375294
HOXC6	5	6.1e-05	0.381807
S100A1	5	1.56e-05	0.373974
TCN2	5	0.0008	0.374194
CYP17A1	5	3.19e-05	0.370284
LSM12P1	5	6.74e-05	0.375294
ARHGEF12	5	6.77e-05	0.399499
KCNIP3	4	6.96e-05	0.350742
SNX27	4	2.43e-05	0.420013
NUMBL	4	1.06e-05	0.417813
CACNA1A	4	0.000172	0.367935
BLOC1S1	4	6.58e-05	0.408451
CNTN1	4	0.000146	0.371578
PFDN4	4	1.37e-05	0.380896
PDX1	4	3.26e-05	0.364989
MFNG	4	9.8e-07	0.361473
PRCP	4	2.14e-05	0.349589
IRF2BPL	4	0.000233	0.401258
IGF1	4	5.04e-05	0.349781
IGF2	4	5.04e-05	0.349781
APBA1	4	0	0.391411
TRAPPC9	4	0.000315	0.423358
LFNG	4	2.93e-05	0.395046
GP6	4	5.08e-06	0.347874
LAMP1	4	2.17e-05	0.414286
CUBN	4	4.42e-05	0.366456
RUFY1	4	6.02e-05	0.398004
DTX2	4	6.23e-05	0.373974
ACOT9	4	0.000614	0.372012
REV3L	4	3.51e-05	0.325013
MYBPC2	3	0.000111	0.343011
NBEA	3	9.73e-06	0.386667
RASA3	3	1.69e-05	0.377292
NMD3	3	0	0.342091
PPP3R2	3	1.59e-05	0.364571
UBXN8	3	7.77e-05	0.346928
WDR11	3	1.83e-05	0.408451
CR2	3	7.5e-05	0.358628
MTIF2	3	0.00033	0.315529
CDH3	3	5.59e-06	0.360045
ZBED4	3	1.22e-05	0.393099
LRBA	3	9.73e-06	0.386667
ACOT1	3	0.0001	0.390214
CLIC5	3	1.76e-05	0.331085
CCZ1B	3	4.41e-06	0.399499
KIAA0391	3	0.000116	0.300377
MKRN2	3	7.34e-05	0.335789
CCZ1	3	4.41e-06	0.399499
TDRD7	3	1.63e-06	0.343195
CDC14B	3	2.45e-06	0.376846
MEF2C	3	5.6e-06	0.391892
LIPF	3	2.79e-05	0.307322
RPP14	3	2.61e-05	0.353463
GALNT10	3	0.000152	0.311523
LETMD1	2	0	0.366878
BICD2	2	6.78e-06	0.344492
LILRB2	2	0.000131	0.362089
NCKAP1L	2	2.4e-05	0.366667
PDLIM3	2	1.47e-05	0.316625
SERF2	2	4.54e-06	0.305117
KRT27	2	0	0.341176
MUC7	2	1.9e-05	0.289737
SLFN5	2	5.58e-05	0.363948
TRAPPC10	2	0	0.362294
SMC6	2	2.13e-05	0.383413
ELMO1	2	1.34e-05	0.390214
ECI1	2	9.06e-05	0.359842
MEP1B	2	4.53e-06	0.34375
RLTPR	2	1.05e-05	0.365826
PLCB2	2	7.2e-06	0.332465
WNT2	1	0	0.328358
CCR3	1	0	0.328358
DLL4	1	0	0.358628
CHST15	1	0	0.328358
KL	1	0	0.334557
C18orf8	1	0	0.358628
NGEF	1	0	0.328358
SLC23A3	1	0	0.334557
FURIN	1	0	0.358628
TNFRSF8	1	0	0.310613
FFAR2	1	0	0.334557
ALDH6A1	1	0	0.28444
AMY2A	1	0	0.334557
MAU2	1	0	0.358628
KRT74	1	0	0.310613
RBP3	1	0	0.358628
CAMP	1	0	0.334557
