# Supplementary material for: A Network-Based Method for Mechanistic Investigation and Neuroprotective Effect on Post-treatment of Senkyunolid-H Against Cerebral Ischemic Stroke in Mouse
Source: Front Neurol. 2019 Dec 19;10:1299. doi: 10.3389/fneur.2019.01299 (PMC6930873; doi:10.3389/fneur.2019.01299)
Supplement: Supplementary file 4 [file Table_4.XLSX]

## Sheet: CIS TARGET
Topological indices of PPI network for IS-related targets
Node	Degree	BetweennessCentrality	ClosenessCentrality
NTRK1	960	0.0521733	0.549847
ESR1	764	0.0441955	0.525885
CUL3	631	0.0167276	0.517932
APP	616	0.0531532	0.526347
FN1	608	0.0269762	0.51823
MCM2	574	0.0153364	0.51065
TP53	544	0.015079	0.510795
ITGA4	524	0.0148454	0.501814
XPO1	505	0.0183637	0.50343
EGFR	494	0.0219999	0.514596
UBC	479	0.0163583	0.509493
CUL7	471	0.00539184	0.494024
HSP90AA1	465	0.0163306	0.514229
CDK2	450	0.00808833	0.495863
COPS5	443	0.00762661	0.501115
CUL1	431	0.00569635	0.494772
VCAM1	418	0.00530156	0.486867
RNF2	418	0.00625921	0.486143
SIRT7	402	0.00540892	0.48165
OBSL1	400	0.00398545	0.481199
YWHAZ	396	0.00940794	0.501814
CAND1	396	0.00372478	0.48431
NPM1	393	0.00574862	0.499653
TRAF6	375	0.0102978	0.494772
GRB2	369	0.0136699	0.501884
FBXO6	362	0.0126065	0.485225
CCDC8	355	0.00430402	0.480492
HSP90AB1	352	0.00660203	0.497785
VCP	343	0.00800362	0.499792
EED	332	0.00316767	0.468229
VHL	330	0.0079499	0.482879
HNRNPU	329	0.00349885	0.480043
HSPA4	328	0.0115383	0.491794
HLA-B	328	0.0111074	0.461262
HSPA5	327	0.00761737	0.497579
HUWE1	326	0.00415461	0.481908
HNRNPA1	325	0.00492834	0.491123
BRCA1	324	0.00715602	0.481779
MYC	322	0.00707118	0.488786
EP300	321	0.00646508	0.484506
HSPA8	321	0.00743212	0.49813
EWSR1	321	0.00869503	0.486406
CDC5L	318	0.00447705	0.474281
SNW1	306	0.00410635	0.478446
HDAC5	302	0.00246155	0.473719
HDAC1	288	0.00415478	0.472847
IKBKE	286	0.00373739	0.469881
YWHAQ	284	0.00330559	0.484114
EEF1A1	282	0.00381202	0.482685
CUL2	280	0.00209038	0.470065
PARK2	278	0.00310304	0.477493
UBE2I	274	0.00464029	0.478382
VIM	270	0.0110435	0.479979
RPA1	270	0.00265605	0.475221
MDM2	270	0.00386487	0.480749
HIST1H3B	267	0.00107568	0.463223
HIST1H3G	267	0.00107568	0.463223
HIST1H3I	267	0.00107568	0.463223
HIST1H3H	267	0.00107568	0.463223
HIST1H3J	267	0.00107568	0.463223
HIST1H3D	267	0.00107568	0.463223
HIST1H3A	267	0.00107568	0.463223
HIST1H3E	267	0.00107568	0.463223
HIST1H3C	267	0.00107568	0.463223
HIST1H3F	267	0.00107568	0.463223
PAN2	266	0.00197002	0.45739
CUL5	263	0.00186717	0.466165
U2AF2	261	0.00238179	0.474845
YWHAE	252	0.003883	0.479595
SRC	246	0.00599911	0.486012
HSPA1B	245	0.00444615	0.481328
HSPA1A	245	0.00444615	0.481328
SUZ12	244	0.00158396	0.457623
AR	244	0.00365532	0.471854
FUS	244	0.00240408	0.47781
ARRB2	241	0.00314403	0.471236
IKBKG	238	0.00419115	0.478128
STAU1	231	0.00128005	0.472598
YWHAG	230	0.00319092	0.481908
HSPB1	229	0.00408191	0.478637
CTNNB1	229	0.00358887	0.48444
TARDBP	225	0.00117553	0.469758
CREBBP	224	0.00289575	0.459318
SMURF1	224	0.00233425	0.473033
RPA3	224	0.00138417	0.462568
AKT1	221	0.00390691	0.479979
NR3C1	216	0.00464449	0.459553
TUBB	215	0.00210789	0.484114
CSNK2A1	212	0.0020696	0.477366
ACTB	212	0.00416433	0.478319
CSNK2A3	212	0.0020696	0.477366
BMI1	211	0.00178122	0.452156
COMMD3-BMI1	211	0.00178122	0.452156
RPS27A	211	0.00265312	0.474719
ILF3	209	0.00131258	0.464
MYH9	208	0.00295702	0.474845
CUL4B	207	0.00135006	0.468962
UBL4A	205	0.00132923	0.458791
BAG3	204	0.00431211	0.465201
CALM3	203	0.00290419	0.476418
CALM1	203	0.00290419	0.476418
CALM2	203	0.00290419	0.476418
RPL10	203	0.00101381	0.453011
MCM5	201	0.00157095	0.466771
MAPK1	199	0.00268509	0.473719
HNRNPK	199	0.00122558	0.475661
RPS3	198	0.00051191	0.468595
PARP1	197	0.00192198	0.467559
EZH2	197	0.00120806	0.455536
HNRNPM	196	0.00094337	0.466105
CLTC	195	0.00278196	0.475724
RELA	195	0.00327257	0.471916
NCL	194	0.00117813	0.470188
SMAD3	191	0.0029937	0.473469
H2AFX	191	0.00155247	0.463283
YWHAB	189	0.0023806	0.472102
RPS2	189	0.00087621	0.459847
HDAC2	189	0.00131493	0.456056
HDAC6	187	0.00263285	0.469697
FLNA	187	0.00270626	0.471916
ARRB1	184	0.00192599	0.46406
RACK1	184	0.0026548	0.471545
HSPA9	184	0.00157548	0.47667
NEDD8	183	0.0009648	0.457972
ABL1	182	0.00296768	0.474219
EIF4A3	182	0.0006293	0.456867
TUBG1	182	0.0016982	0.467864
PPP1CA	182	0.00360658	0.469758
DHX9	182	0.00081343	0.467803
CD81	181	0.00170343	0.441986
XRCC6	181	0.00228727	0.468107
LRRK2	180	0.00172867	0.449275
RPS8	180	0.00054258	0.456925
PRKDC	180	0.00157364	0.47173
RPL6	179	0.00059944	0.456519
PABPC1	179	0.00070658	0.466286
HIST2H4A	178	0.0005759	0.464539
HIST1H4E	178	0.0005759	0.464539
HIST1H4B	178	0.0005759	0.464539
HIST1H4L	178	0.0005759	0.464539
HIST1H4J	178	0.0005759	0.464539
HIST1H4K	178	0.0005759	0.464539
HIST1H4H	178	0.0005759	0.464539
HIST1H4C	178	0.0005759	0.464539
HIST1H4A	178	0.0005759	0.464539
HIST1H4F	178	0.0005759	0.464539
HIST1H4D	178	0.0005759	0.464539
HIST1H4I	178	0.0005759	0.464539
RPS3A	178	0.00044168	0.460317
HIST2H4B	178	0.0005759	0.464539
HIST4H4	178	0.0005759	0.464539
PSMA3	177	0.00217855	0.462627
DDX5	177	0.00086464	0.468656
RPS4X	176	0.00039787	0.459318
CRK	175	0.00312506	0.463342
STUB1	175	0.00242967	0.47204
SMAD2	175	0.00200217	0.459083
CDK1	174	0.00195937	0.46939
CUL4A	173	0.00098389	0.451475
IQGAP1	173	0.00156481	0.463104
AURKA	173	0.00192571	0.4643
RAD21	173	0.0018561	0.443513
IGSF8	172	0.00131208	0.423258
JUN	172	0.00202524	0.461855
HIF1A	172	0.0055698	0.461321
SRRM2	171	0.00106553	0.461973
SHC1	171	0.00202101	0.469268
TRIM28	169	0.00159707	0.468168
RPS6	169	0.00030797	0.456345
ILF2	169	0.00051051	0.457332
CDC37	168	0.00241998	0.465562
SRPK2	168	0.00278158	0.455998
RPL5	168	0.00035121	0.457332
GAPDH	168	0.00174939	0.478701
RUVBL2	167	0.00167336	0.477113
SYNCRIP	167	0.00160335	0.467681
RPS14	167	0.00035374	0.458849
RPLP0	167	0.00029552	0.459905
MAP3K3	167	0.00105629	0.455651
BTRC	165	0.0027664	0.455651
CEP250	164	0.00097612	0.442803
RB1	164	0.00132749	0.454442
MAP3K1	164	0.00092112	0.460907
FBXW11	163	0.00157087	0.455709
TERF1	163	0.00182118	0.450627
CBL	163	0.00246037	0.465201
TRAF2	162	0.00234844	0.456172
RPS16	162	0.00033788	0.460967
ICAM1	162	0.00220046	0.422711
HSPD1	162	0.00220414	0.474908
GSK3B	162	0.0026774	0.46418
XRCC5	161	0.00133633	0.462389
RPL24	161	0.00030162	0.447932
RPL4	161	0.00039958	0.457274
CDKN1A	160	0.00260314	0.465321
RPL14	160	0.00037045	0.444994
SMARCA4	160	0.0009901	0.45284
RPL13	160	0.00043565	0.456693
SIRT1	160	0.001225	0.451249
TNFRSF1A	159	0.00296674	0.45057
STAT3	159	0.00254029	0.461914
PCNA	159	0.00171091	0.461321
MED4	159	0.00198816	0.43493
FYN	159	0.00309581	0.449219
RPL23A	158	0.00031905	0.452441
YBX1	158	0.00102986	0.467256
NFKB1	158	0.00136319	0.460553
LMNA	158	0.00150003	0.457972
HSPA1L	158	0.00372658	0.461144
RPSA	158	0.00160915	0.458498
ATF2	157	0.00145278	0.456461
TUBA1A	157	0.00292908	0.467074
RPS6KB2	157	0.00207312	0.44406
PTEN	157	0.00229245	0.453411
HNRNPD	157	0.00116385	0.467864
ADRB2	156	0.0026255	0.451702
RPL23	156	0.00053775	0.455767
HDAC3	156	0.00084923	0.453296
SOD1	156	0.00378554	0.425965
PIK3R1	156	0.00289682	0.460141
CSNK2B	154	0.00296668	0.463761
BARD1	154	0.00096563	0.445933
SP1	154	0.0011457	0.457506
NOP56	153	0.00034416	0.432992
KAT5	153	0.00140777	0.459318
PPP1CC	153	0.00263434	0.46472
HNRNPA2B1	153	0.00059388	0.464
SFN	153	0.00091417	0.451532
PAXIP1	152	0.00209086	0.444719
RUVBL1	152	0.00107981	0.468412
RPL7	152	0.00016396	0.45227
MAPK3	152	0.00166614	0.458966
PRKCA	152	0.0023919	0.457332
POLR2A	152	0.0013658	0.45427
USP7	151	0.00156397	0.45542
HNRNPR	150	0.0007029	0.45967
RBBP4	150	0.00107323	0.45227
MAGOH	150	0.00035655	0.429886
HNRNPH1	150	0.0009826	0.458615
RPS7	149	0.00025415	0.444884
ABCE1	149	0.00164179	0.45496
RPL7A	148	0.00019787	0.452612
PML	148	0.00144021	0.457332
RPS15A	147	0.00023151	0.450344
RPL11	147	0.00029145	0.453411
PSMD2	147	0.00123958	0.454212
PIN1	147	0.00162499	0.459318
IFI16	147	0.00124733	0.442803
RPS19	146	0.00049736	0.45284
RPS11	146	0.00030726	0.448156
RPS10	146	0.00039431	0.452384
COPS6	145	0.00163309	0.456056
SMN2	145	0.00093963	0.444609
SMN1	145	0.00093963	0.444609
RPS9	145	0.00031779	0.459377
RPL18	145	0.00015127	0.449388
HIST3H3	144	0.00083337	0.440309
PXN	144	0.00118277	0.452954
KDM1A	143	0.00228727	0.446431
RPS13	143	0.00017514	0.448603
RPS5	143	0.00023533	0.443513
RPL8	143	0.00026112	0.448659
SFPQ	142	0.00060552	0.458206
RPS20	142	0.00036562	0.454098
SOX2	142	0.00125911	0.435826
WWOX	142	0.00075537	0.439824
EIF6	142	0.00078991	0.449275
FBL	142	0.00072332	0.447765
BAG6	141	0.00338614	0.451759
RPL19	141	0.00013984	0.436143
DBN1	141	0.00107537	0.455363
EIF1B	140	0.00079004	0.425562
KAT2B	140	0.00099277	0.436355
RPS18	140	0.00047843	0.450401
VCL	139	0.00153211	0.452897
RPL31	139	0.00016758	0.444994
RPL3	139	0.00023942	0.452043
ILK	139	0.00087118	0.451419
KPNB1	139	0.00122204	0.459788
PPP2R1A	138	0.00154993	0.462568
DCUN1D1	138	0.00071855	0.446708
SF3B1	137	0.00063296	0.450457
ACTG1	137	0.00123731	0.456809
SQSTM1	137	0.00224251	0.463522
PPP2CA	136	0.00122969	0.462568
OTUB1	135	0.00108194	0.457041
PCBP1	135	0.00135749	0.46394
DDX3X	135	0.00037965	0.46073
MCM7	134	0.0009131	0.461262
SNCA	133	0.00154963	0.459142
HTT	133	0.00146405	0.449444
SUMO2	132	0.00116196	0.44428
PKM	132	0.00111578	0.465502
EEF2	131	0.00049556	0.457448
RPL22	131	0.00029188	0.448547
PPP1CB	131	0.00093014	0.445988
NCOR1	130	0.00071522	0.438858
CCT3	130	0.00064074	0.45844
RPL37A	130	0.00036662	0.438537
MAPK8	130	0.00109573	0.453926
UCHL5	130	0.00120323	0.448715
DAXX	130	0.00110069	0.438965
CCT2	129	0.00071003	0.463342
RPS25	129	0.00015884	0.450344
DDX17	128	0.00054248	0.466347
STAT1	128	0.00149181	0.453926
PRKAB1	128	0.00086896	0.434772
STIP1	127	0.00092807	0.456925
RPS24	127	0.00010308	0.434877
RPL27A	127	0.00013425	0.430917
RPL21	127	0.00015766	0.441119
RPL9	127	0.00020747	0.440255
RPL10A	127	0.00014289	0.447486
MAPK14	126	0.00116352	0.449837
RAF1	126	0.00110307	0.451135
NFKBIA	126	0.00095634	0.455767
NEDD4	126	0.00113556	0.44527
ERBB2	126	0.0018254	0.450909
CSNK2A2	125	0.00176636	0.45074
IQCB1	125	0.00136995	0.435826
MATR3	125	0.00030186	0.444554
PRKACA	125	0.00259933	0.458732
SMAD4	125	0.00137517	0.452669
IKBKB	125	0.00094078	0.453754
DNAJA1	125	0.00069561	0.455825
CAV1	125	0.00298617	0.467377
CDK9	124	0.00082318	0.442367
KHDRBS1	124	0.00123258	0.450796
MAP3K14	124	0.00030115	0.433933
RPL35	123	0.00027708	0.425059
RPS23	123	0.00011281	0.437416
RPL12	123	0.00013155	0.452783
PLK1	123	0.00153214	0.456983
NOS2	123	0.00044912	0.436196
RPL36	122	0.00015866	0.435932
CFTR	122	0.00127683	0.441011
CHUK	122	0.00082895	0.460435
ISG15	122	0.00130591	0.440039
SET	122	0.00080154	0.46073
RPL17	122	0.00010069	0.441011
RPL18A	122	0.00026829	0.436991
PPARG	122	0.00121785	0.447821
TMEM17	122	0.00295599	0.406511
HNRNPF	122	0.00055827	0.454327
AHSA1	121	0.00046364	0.450796
TUFM	121	0.00071323	0.450627
DHX15	121	0.00051492	0.451192
CFL1	120	0.00142756	0.458849
TUBA1C	120	0.00052281	0.452612
SUMO1	120	0.00101915	0.439609
PRMT1	120	0.00062321	0.450796
CASP8	120	0.00164117	0.449669
ENO1	119	0.00140684	0.455305
BCL2	119	0.00373167	0.436726
TUBA4A	119	0.0013822	0.453811
RPL27	119	0.0001168	0.421423
SPTAN1	119	0.00066815	0.453354
PSMC5	119	0.00058524	0.453239
SF3A1	118	0.00033374	0.434667
UBE2D1	118	0.00131067	0.44406
PSMD4	118	0.00064156	0.458323
FBXO25	118	0.00054236	0.436249
FAF2	117	0.00153679	0.443021
C1QBP	117	0.00134668	0.453582
TUBB4B	117	0.00055524	0.457157
RPS26	117	0.00014687	0.437949
RPLP2	117	0.00022737	0.437416
LOC101929876	117	0.00014687	0.437949
CANX	117	0.00195202	0.4481
CDKN2A	116	0.00133701	0.453411
CHD3	116	0.00103892	0.438483
YWHAH	116	0.00112843	0.457972
TERF2	116	0.0007112	0.432367
SRSF1	116	0.00053827	0.458381
HNRNPC	116	0.00060801	0.460553
CASP3	116	0.00087124	0.449331
SLC25A5	115	0.0003695	0.454385
HSP90B1	115	0.00164472	0.456287
CRY2	114	0.00034969	0.43493
ATP5A1	114	0.00075226	0.457565
AURKB	114	0.00073832	0.449444
UBB	114	0.00075156	0.462746
TOP1	114	0.00021722	0.449107
TNF	114	0.00725125	0.416204
TKT	114	0.00122181	0.442149
NF2	114	0.00074264	0.430452
SIN3A	114	0.00061684	0.441173
PRPF40A	113	0.00126612	0.440956
RC3H1	113	0.00030548	0.414764
OFD1	112	0.00096271	0.431278
RPL38	112	0.00018806	0.428912
RPL30	112	0.00013664	0.437576
PTK2	112	0.00158865	0.450232
FOS	112	0.00077043	0.443185
EPB41	111	0.00082953	0.44417
DDX21	111	0.00027758	0.448267
SF1	111	0.0007335	0.438323
FBXW7	111	0.00101055	0.429938
PHB	111	0.00101358	0.457216
PRKCD	111	0.00147114	0.450853
EEF1D	110	0.00062234	0.462151
PHB2	110	0.00092407	0.448435
TCP1	110	0.00067171	0.452954
PSMA1	110	0.00099866	0.447709
NOTCH1	110	0.00184096	0.445877
PAK2	110	0.00067418	0.446653
DYNC1H1	109	0.00085057	0.452897
SNRNP200	109	0.00033812	0.450966
CCT4	109	0.00058644	0.454155
ATP5B	109	0.00126202	0.456983
SRPK1	109	0.00077918	0.448715
PLCG1	109	0.0012298	0.436037
DYNLL1	108	0.00122831	0.44047
RPS12	108	9.304e-05	0.438858
PSMC2	108	0.00043586	0.446653
NONO	108	0.00052931	0.451702
RPL13A	107	0.00013161	0.435246
TP53BP1	107	0.00042138	0.435457
TRIM27	107	0.00118103	0.431278
RAC1	107	0.00126561	0.440794
KPNA2	107	0.00096707	0.459553
CRY1	106	0.00033993	0.432471
ANXA2	106	0.00072731	0.464539
HDAC4	106	0.00087305	0.440416
ATXN1	106	0.00117432	0.428248
LDHA	106	0.00073798	0.447208
CDC42	105	0.00122451	0.437896
GAN	105	0.00039348	0.422165
NFKB2	105	0.00020453	0.432419
LYN	105	0.00175231	0.448939
ERBB3	105	0.00111944	0.43662
DCTN1	105	0.00116166	0.436408
WDR5	104	0.00057276	0.449163
CCT6A	104	0.00043035	0.449725
SNRNP70	104	0.00050082	0.451419
RBBP7	104	0.00036235	0.423358
GOLGA2	104	0.0012596	0.439716
PRPF19	104	0.00063606	0.44417
CAD	103	0.00017159	0.449388
EMD	103	0.00078774	0.454385
UBE2D3	103	0.00093962	0.437044
RPS21	103	0.0001709	0.427739
RPN1	103	0.00053576	0.453011
PTBP1	103	0.00021416	0.451079
MCM3	103	0.00040847	0.448379
TBK1	103	0.00079823	0.459318
HNRNPL	103	0.00032974	0.444719
PRPF8	102	0.00038851	0.448323
CCT7	102	0.00067423	0.457448
SETDB1	102	0.0007593	0.426218
RAB7A	102	0.00090769	0.435879
HECW2	102	0.00076124	0.412433
NFATC2	102	0.00053059	0.43493
MSN	102	0.00112179	0.444884
NAP1L1	102	0.0004935	0.446486
LDHB	102	0.00062214	0.440632
APC	101	0.00133703	0.434352
NCOA3	101	0.00044129	0.439018
PSMA6	101	0.00042262	0.443239
RAN	101	0.00048526	0.444115
GRK5	101	0.00049586	0.427841
CBX5	100	0.00039877	0.413381
UBE2D2	100	0.00092992	0.434247
SNRPA1	100	0.000346	0.431537
RXRA	100	0.00069813	0.422165
HSPE1	100	0.00106086	0.432575
CCT5	99	0.0002746	0.450401
SRRM1	99	0.00029708	0.433149
HGS	99	0.00143145	0.449556
PABPC4	99	0.00026175	0.441065
PSMA2	99	0.00028493	0.442966
RANBP2	99	0.00073903	0.441498
NCK1	99	0.00083083	0.41848
AP2M1	98	0.0008248	0.448603
SKP1	98	0.0006254	0.447932
RPS17	98	7.961e-05	0.431123
RPL26	98	0.00018259	0.418285
PTPN11	98	0.00081007	0.434982
RARA	98	0.00049629	0.434982
UBQLN1	98	0.00337247	0.443731
ACTA1	97	0.00074838	0.445546
TAGLN2	97	0.00101699	0.437257
VDAC1	97	0.00078646	0.437842
TXN	97	0.00085542	0.451816
TRAF1	97	0.00086695	0.431175
P4HB	97	0.00102368	0.453697
KRT18	97	0.00057333	0.450627
ESR2	97	0.00058522	0.425663
DDX1	97	0.00022982	0.454902
ARF6	96	0.00051711	0.433985
CCT8	96	0.00024949	0.455478
MAPRE1	96	0.00080309	0.456114
NCOR2	96	0.00034608	0.426066
USP9X	96	0.00050028	0.444225
PSMC3	96	0.00046684	0.440524
RAD23A	96	0.00059814	0.431848
PINX1	96	0.00027966	0.413476
NME2	96	0.00061617	0.429989
SNU13	96	0.00020693	0.419799
PRDX1	96	0.00052531	0.446099
KMT2A	96	0.00022951	0.413333
HNRNPA3	96	0.00021884	0.448715
NME1-NME2	96	0.00061617	0.429989
EPS15	96	0.00050471	0.446375
ATM	95	0.00058522	0.438697
MED23	95	0.00088333	0.426268
EZR	95	0.00093604	0.450683
SPTBN1	95	0.000362	0.453182
SNRPD1	95	0.00023658	0.441011
PSMD1	95	0.00027918	0.445049
LUC7L2	95	0.00046118	0.439394
MAP3K5	95	0.00112038	0.43409
POT1	95	0.0009583	0.421423
ALB	94	0.00341359	0.431072
EFTUD2	94	0.0002461	0.443677
RPS28	94	7.052e-05	0.410175
MYO1C	94	0.00050554	0.438644
IRAK1	94	0.00082103	0.43859
LGALS3BP	94	0.00065724	0.44417
CEP128	94	0.00055377	0.416348
SERBP1	94	0.00023321	0.448267
SUPT16H	93	0.00027245	0.439179
FAF1	93	0.00046648	0.435351
TUBA1B	93	0.00058141	0.447375
RBM39	93	0.00026383	0.446653
RPS15	93	6.753e-05	0.41975
PSMC1	93	0.00041872	0.443786
PAK1	93	0.00049753	0.446653
ITGB1	93	0.00148583	0.435879
TCTN3	93	0.00155064	0.396822
THRAP3	92	0.0002328	0.440956
PSMB1	92	0.0003679	0.429578
REL	92	0.00124474	0.434772
HIST1H2BD	92	0.00040204	0.432419
IMMT	91	0.00075855	0.442312
UQCRC2	91	0.00032984	0.430144
UBE3A	91	0.00125293	0.456056
SMARCC1	91	0.000261	0.441281
GTF2I	91	0.000768	0.443239
CALR	90	0.0011839	0.454442
ELAVL1	90	0.00028155	0.442639
ANXA1	90	0.00145606	0.440578
RBX1	90	0.0003423	0.443458
VAPA	90	0.00095466	0.443294
HIST1H2BC	90	0.00038294	0.431848
HIST1H2BI	90	0.00038294	0.431848
HIST1H2BF	90	0.00038294	0.431848
HIST1H2BE	90	0.00038294	0.431848
HIST1H2BG	90	0.00038294	0.431848
SDCBP	90	0.00133303	0.422165
SSRP1	90	0.00016329	0.426471
MAPT	90	0.0005285	0.451022
DSP	89	0.00040416	0.434877
TOP2A	89	0.00015493	0.443951
TGFBR1	89	0.00151794	0.427281
PSMA7	89	0.00058669	0.450063
UPF1	89	0.00041213	0.440848
HSD17B10	89	0.00064613	0.441227
MTOR	89	0.00047778	0.442966
BAG2	88	0.0003874	0.446099
MAP3K7	88	0.00053309	0.43859
LRIF1	88	0.0006343	0.418821
SMC3	87	0.00033716	0.440632
TLN1	87	0.00057204	0.440416
SRSF7	87	0.00025892	0.435193
SRSF3	87	0.00014754	0.441769
SRSF2	87	0.00038563	0.44313
PSMD3	87	0.0002536	0.429989
SIRT6	87	0.00019443	0.424057
PDIA3	87	0.00114687	0.451986
RBMX	87	0.00037291	0.441606
TNIK	86	0.00045088	0.419212
CDH1	86	0.0005421	0.43388
CHD4	86	0.00020381	0.431485
TSC22D1	86	0.00054629	0.422165
TMPO	86	0.00034	0.434404
TBP	86	0.00037879	0.425411
RPL32	86	5.484e-05	0.417266
PSMC6	86	0.00019782	0.435351
PA2G4	86	0.00028716	0.448267
HIST1H1A	86	0.00035658	0.411913
SENP3	86	0.00030297	0.436355
XIAP	85	0.00061515	0.424908
H3F3AP4	85	0.00016098	0.423957
TUBGCP3	85	0.00026204	0.427841
TSG101	85	0.00076506	0.440632
SYK	85	0.00069663	0.441011
RAD23B	85	0.00037516	0.430041
NCBP1	85	0.0006877	0.430298
H3F3A	85	0.00016098	0.423957
H3F3B	85	0.00016098	0.423957
APOA1	84	0.00709908	0.406649
CREB1	84	0.00033224	0.415771
CDC20	84	0.0004781	0.440362
PUF60	84	0.0002009	0.435193
PSME3	84	0.00086684	0.431537
G3BP1	84	0.00031733	0.45057
CEP57	84	0.00069512	0.42521
SKI	84	0.00019801	0.430452
NOP2	84	8.091e-05	0.429015
ANLN	84	0.00032268	0.400981
TAB2	83	0.00041612	0.456925
HSPH1	83	0.00026739	0.43409
SEC16A	83	0.00043038	0.435088
CBX4	83	0.00025794	0.409707
TNFRSF1B	83	0.0004414	0.426673
TGM2	83	0.00084368	0.447319
SNRPD3	83	0.0001015	0.425915
SNRPD2	83	9.916e-05	0.43133
LYAR	83	0.00021716	0.413809
QARS	83	0.00024169	0.439233
PIK3R2	83	0.00060188	0.451702
PRKCZ	83	0.00080404	0.439233
E2F1	82	0.00033218	0.430813
RIPK3	82	0.00023385	0.425461
CTTN	82	0.00044739	0.436408
ACTN1	82	0.00040045	0.443349
ACTN4	82	0.00046973	0.444335
COPS2	82	0.00029235	0.41931
SMAD1	82	0.00058449	0.435773
HRAS	82	0.00081736	0.432056
EPRS	82	0.00018848	0.446653
HNRNPUL1	81	0.00034978	0.43341
ACTR2	81	0.00064107	0.443786
HIST2H2AC	81	0.00022318	0.426876
IRS4	81	0.00025864	0.441823
TRIP6	81	0.00079386	0.417751
TADA2A	81	0.00028437	0.418821
SMARCA2	81	0.00015027	0.423857
PTMA	81	0.00034358	0.421077
JAK2	81	0.00089982	0.432367
LGALS3	81	0.00130583	0.438804
LCK	81	0.00074758	0.434142
NR4A1	81	0.00069523	0.429527
A2M	80	0.00327919	0.423607
HDAC9	80	0.0003104	0.405732
UBE2N	80	0.00088217	0.434772
NCOA1	80	0.00030276	0.424207
TK1	80	0.00092384	0.432732
RPL35A	80	6.938e-05	0.398802
PSMC4	80	9.904e-05	0.425965
BIRC2	79	0.00046248	0.419897
AHCYL1	79	0.00042123	0.416928
CDK8	79	0.00029762	0.413904
CD4	79	0.0011234	0.424457
MYBBP1A	79	0.00012782	0.439985
HNRNPDL	79	0.0001116	0.434667
SRSF5	79	0.00014522	0.43409
SSB	79	0.00022989	0.446486
PLEC	79	0.00028441	0.444884
UBXN1	79	0.00045585	0.429373
TERF2IP	79	0.00089581	0.412954
JUP	79	0.00053744	0.446154
FTSJ1	79	0.00029952	0.420339
EPAS1	78	0.00049394	0.428197
BCL2L1	78	0.00088297	0.403003
RBM14	78	0.00014164	0.437629
SMC1A	78	0.00025411	0.4343
YY1	78	0.00021784	0.437736
RBM14-RBM4	78	0.00014164	0.437629
MCM6	78	0.00023182	0.429989
KIF11	78	0.00074799	0.423457
RHOA	77	0.00067304	0.430195
CSE1L	77	0.00032125	0.444829
ANXA7	77	0.00090859	0.425109
PDCD6IP	77	0.00080595	0.438483
NDRG1	77	0.00026632	0.428861
EIF3A	77	0.00016761	0.426268
ZBTB16	77	0.00096099	0.427841
SIAH1	77	0.00067193	0.416686
MEN1	77	0.00013554	0.42029
IGBP1	77	0.00046851	0.422264
HNRNPH2	77	0.0002147	0.436461
NUDT21	76	0.00062561	0.444499
AIRE	76	0.00022068	0.429117
PTGES3	76	0.00032832	0.444554
ALYREF	76	0.00018382	0.443185
LNX1	76	0.00134416	0.422711
CEP170	76	0.00053108	0.429732
CEP76	76	0.00023243	0.402552
TCF3	76	0.00041936	0.415578
RAB5C	76	0.00060844	0.434509
MAPK6	76	0.00054063	0.423358
PPM1G	76	0.0002373	0.422512
HNRNPH3	76	0.00025308	0.434247
CTBP1	76	0.00037638	0.431848
HNRNPA0	75	6.359e-05	0.434614
CRKL	75	0.00076612	0.427942
ALDOA	75	0.00031508	0.437896
RCC1	75	0.00015905	0.419408
UBASH3B	75	0.00015458	0.430762
CCAR2	75	0.00022372	0.439663
PSMA4	75	0.00017185	0.427637
MSH2	75	0.00030886	0.432367
IARS	75	0.0001804	0.446597
TRIM29	75	0.00025916	0.414955
KIAA0368	75	0.0005417	0.428401
DNM2	74	0.00079161	0.442803
PSMD6	74	0.00015259	0.421127
VDR	74	0.00035149	0.411395
UBE2L3	74	0.00032451	0.439179
TUBB2A	74	0.0003184	0.433671
SMARCE1	74	0.00029561	0.426117
EIF2AK2	74	0.00030739	0.432575
PGK1	74	0.00025818	0.435509
PPIA	74	0.00068237	0.450683
PON2	74	0.00522559	0.404818
DNAJB1	74	0.00057152	0.449556
KPNA1	74	0.00032073	0.4343
KRT40	74	0.00090402	0.395426
CCND1	73	0.00041196	0.439448
MED20	73	0.00038156	0.409381
MTA2	73	0.00019866	0.425915
PIAS1	73	0.00030177	0.427993
TP53BP2	73	0.00051409	0.433828
PRDX2	73	0.00046552	0.441119
RIF1	73	0.00069311	0.42162
PRKCB	73	0.00033217	0.431278
PPIB	73	0.0004531	0.442204
PCBP2	73	0.00017645	0.436779
MIF	73	0.00089135	0.426622
EIF3E	73	0.00026087	0.430144
MGMT	73	0.0001694	0.426825
PELP1	73	9.01e-05	0.431693
ESRRB	73	0.00021165	0.415338
DNMT1	72	0.00015032	0.430195
NUDC	72	0.00047939	0.429066
ANP32B	72	0.00020347	0.441335
HAX1	72	0.00076866	0.43715
FUBP1	72	0.00034345	0.433566
EIF3I	72	0.00025899	0.432628
ZYX	72	0.00038929	0.421818
SMARCB1	72	0.00025961	0.437949
PTPN1	72	0.00079912	0.43934
PPP2CB	72	0.00055037	0.431485
HMGA1	72	0.00020256	0.437204
ERG	72	0.0001138	0.427841
CNTRL	71	0.0002951	0.401878
NCOA6	71	0.0001606	0.423807
CLU	71	0.00195296	0.452156
PDCD6	71	0.00043789	0.436196
TAB1	71	0.00037654	0.442966
MMS19	71	0.0005211	0.434142
SKP2	71	0.00022053	0.42718
PSMB5	71	0.00015123	0.430968
PSEN1	71	0.00115119	0.427891
PCMT1	71	0.00070131	0.441227
MCM4	71	6.034e-05	0.414716
IRS1	71	0.00028521	0.445933
HSF1	71	0.00045347	0.415578
EHMT2	70	0.00017506	0.412007
PSMD14	70	0.00022344	0.424858
LRPPRC	70	0.0002247	0.442966
RANBP9	70	0.00058721	0.448659
NCOA2	70	0.00020614	0.410175
U2AF1	70	0.00010649	0.421868
SMARCD1	70	0.0004871	0.426521
PSMB3	70	0.00013506	0.424507
U2AF1L5	70	0.00010649	0.421868
NOP58	70	5.843e-05	0.423507
HSPA6	70	0.00034947	0.430968
HMGB1	70	0.00055508	0.434667
GARS	70	0.00023616	0.419212
HIST1H1C	70	0.00027284	0.429373
HLA-C	70	0.00167478	0.413952
DKC1	70	0.00015804	0.422413
FAS	69	0.00095697	0.416734
AMFR	69	0.00054657	0.422066
H2AFY	69	0.00029826	0.422016
RPS6KA5	69	0.00022884	0.421176
RIPK1	69	0.00031915	0.423957
TAF9	69	0.00029293	0.414525
SUV39H1	69	0.00032741	0.410643
SLC25A3	69	0.00018265	0.42881
LMNB1	69	0.000353	0.438751
GNB2	69	0.00034736	0.434614
NEDD1	69	0.00024917	0.406603
NINL	68	0.0003219	0.406925
SEC23A	68	0.00032697	0.427586
YBX3	68	0.00014238	0.420683
SNRPB	68	0.00018907	0.416396
MED1	68	0.00023538	0.420437
PIAS4	68	0.00028128	0.416445
GADD45A	68	0.00025202	0.419114
EIF4G1	67	0.00033844	0.43493
EIF4A1	67	0.0001075	0.440902
TFG	67	0.00043524	0.427993
MAP1LC3A	67	0.00042046	0.428044
KHSRP	67	0.00015477	0.434509
UBA52	67	0.0001839	0.421275
TPI1	67	0.00044223	0.435773
TAF1	67	0.0001661	0.400267
SGK1	67	0.00033153	0.412906
RPL29	67	7.144e-05	0.426876
SS18	67	0.00017128	0.427942
NFKBIB	67	0.00072106	0.432315
PAFAH1B1	67	0.00063881	0.412291
MYH10	67	0.0001941	0.430659
CACYBP	67	0.00030202	0.432575
HIST2H3C	66	0.00019616	0.419554
ARHGDIA	66	0.00025115	0.429424
SLC25A6	66	0.0003658	0.435246
AP2B1	66	0.00040586	0.43609
ZBTB1	66	0.00016156	0.415338
BCLAF1	66	0.00017646	0.434352
RAE1	66	0.00029001	0.427586
THRA	66	0.0004306	0.412433
HIST2H3A	66	0.00019616	0.419554
UBQLN4	66	0.00104158	0.411395
AMBRA1	66	0.00023053	0.419554
PSMD13	66	0.00010244	0.42521
RBM4	66	0.00026063	0.427383
NUMA1	66	0.00018649	0.432732
HIST2H3D	66	0.00019616	0.419554
INSR	66	0.00047855	0.426066
IGF1R	66	0.00093414	0.4481
IPO5	66	0.00019004	0.432367
HCFC1	66	0.00021313	0.426876
FKBP5	66	0.00024828	0.439448
FKBP8	66	0.0003194	0.417315
CSNK1A1	65	0.00022124	0.438911
PAICS	65	0.00025049	0.428044
YAP1	65	0.00042367	0.428146
VDAC2	65	0.00028537	0.430659
DNAJC7	65	0.00018721	0.434982
RIPK2	65	0.00022751	0.41814
TGFBR2	65	0.00150896	0.418431
RPL28	65	8.164e-05	0.431796
TRIM21	65	0.00019	0.425059
PSMB4	65	0.00013775	0.425009
RELB	65	9.029e-05	0.418285
POLR2E	65	0.00027212	0.428503
MET	65	0.00078714	0.415674
HNRNPAB	65	0.00010769	0.438858
FLNB	65	0.00021764	0.435088
LARP1	65	7.195e-05	0.422214
CAPZA1	65	0.00016686	0.436567
BCR	64	0.00030444	0.438751
UTP14A	64	0.00028391	0.423009
SPRTN	64	0.00015385	0.408544
MTA1	64	0.00023892	0.431848
YES1	64	0.00057736	0.427841
DEK	64	4.736e-05	0.411112
TPR	64	0.00011125	0.430401
TPM3	64	0.00023896	0.439716
TCEB1	64	0.00027667	0.410268
PSMD7	64	0.00013836	0.420339
MAP2K1	64	0.00023672	0.431123
MAPK9	64	0.00033777	0.416686
PRKAA1	64	0.00037899	0.433828
JAK1	64	0.00070865	0.428912
CYP1A1	64	0.00066572	0.384311
CAPN1	64	0.00069249	0.433514
DYRK1A	63	0.00019119	0.427841
CPSF6	63	0.00019849	0.430298
BRD4	63	0.00011621	0.398405
APOE	63	0.002026	0.394428
DNAJA2	63	0.00016288	0.440524
ATP5C1	63	0.00044264	0.437097
TRAP1	63	0.00061667	0.443841
HIST1H2AB	63	4.39e-05	0.414047
GSTK1	63	0.00021962	0.414333
EIF3F	63	0.00030989	0.441986
SVIL	63	0.00024831	0.430504
SGTA	63	0.00142134	0.419212
MAX	63	0.00016749	0.420044
SND1	63	0.00010845	0.438483
HIST1H2AE	63	4.39e-05	0.414047
GNL3	63	9.347e-05	0.421423
DARS	63	0.00011414	0.441227
NEDD4L	63	0.00037563	0.425613
BTK	62	0.00038524	0.427028
KAT7	62	0.00014725	0.41746
ACTA2	62	0.00072221	0.419848
NUP153	62	0.0001951	0.427891
AHNAK	62	0.00012889	0.437629
TTC1	62	0.00027675	0.411018
STK11	62	0.00034505	0.424407
RANGAP1	62	0.00033812	0.428401
PGR	62	0.00016402	0.417557
MARS	62	0.00016558	0.442204
NASP	62	8.613e-05	0.417897
HNF4A	62	0.000196	0.413001
HINT1	62	0.00042866	0.401922
DAZAP1	62	0.00035785	0.414525
CORO1C	62	0.00040388	0.426369
GCN1	61	0.00015771	0.441552
APEX1	61	0.00015696	0.437257
BAX	61	0.00045479	0.412102
TOMM40	61	0.00030943	0.401608
SUMO4	61	9.07e-05	0.417315
DDX18	61	9.01e-05	0.433566
TRAF3	61	0.00032092	0.414907
SAFB	61	0.00022669	0.424808
PSMB2	61	0.00010651	0.417945
POLR2B	61	0.00021326	0.433357
MYOD1	61	0.00015178	0.417508
DAB2	61	0.00035923	0.428248
RPGRIP1L	60	0.00029748	0.393823
MORF4L1	60	0.00029593	0.421818
ENO2	60	0.00027976	0.4163
CEBPA	60	0.00021589	0.417411
SERPINH1	60	0.00025903	0.435404
CHEK2	60	0.00030987	0.423757
IGF2BP1	60	9.225e-05	0.434982
CLNS1A	60	0.00022541	0.419848
MED12	60	0.00029179	0.424658
TRRAP	60	0.00017437	0.413952
TCTN2	60	0.00080606	0.383983
ANP32A	60	0.00013353	0.415723
CNBP	60	5.701e-05	0.400045
NOS3	60	0.00074184	0.421769
GOLT1B	60	0.00043541	0.385423
HSPA2	60	0.00014015	0.437842
GNAI2	60	0.00093218	0.423507
ETS1	60	0.0001886	0.421522
CAPZB	60	0.00019311	0.43977
DCTN2	59	0.00018278	0.429117
RAD50	59	8.407e-05	0.424107
ATG5	59	0.00018334	0.407479
PCGF1	59	0.00018368	0.398493
CDC73	59	0.00027978	0.421028
PIK3R3	59	0.00042432	0.416348
VTN	59	0.00050046	0.414764
RAD51	59	0.00034687	0.427281
MEOX2	59	0.00076354	0.39814
NBN	59	8.725e-05	0.410268
SCLT1	59	0.00029626	0.399733
ASB15	59	0.00036584	0.431745
FHL2	59	0.00055753	0.437842
CEBPB	58	0.0001245	0.420536
BAG1	58	0.00037705	0.420683
HAUS1	58	0.0002841	0.406374
SETD7	58	0.00019896	0.394601
TRADD	58	0.00011586	0.42281
EIF3H	58	0.00013285	0.426673
AIMP2	58	0.00029518	0.437257
STAT5A	58	0.00026705	0.424207
SRP14	58	0.0001012	0.4163
PTPN6	58	0.00036916	0.419554
NOTCH3	58	0.0046084	0.405092
PDGFRB	58	0.00034141	0.420437
MPG	58	0.00018608	0.41931
INPPL1	58	0.00011828	0.432367
LGALS1	58	0.00035595	0.424658
AGO2	58	0.00026914	0.432004
UBXN7	58	0.00024076	0.426825
CD2AP	58	0.00024522	0.42167
FTSJ3	57	4.43e-05	0.413904
EIF2S1	57	9.856e-05	0.425613
GANAB	57	0.00021776	0.424908
TUBGCP2	57	0.00029935	0.429476
BCL6	57	0.00020645	0.41163
AIFM1	57	0.00017711	0.436726
DNAJA3	57	0.00027501	0.436938
WHSC1	57	4.715e-05	0.411583
TRIM24	57	0.0001367	0.414477
SNX3	57	0.00044931	0.418188
EIF3D	57	0.00010457	0.428197
EIF3C	57	8.007e-05	0.416252
SDHA	57	0.00050984	0.426117
POLR2C	57	0.00023228	0.423109
LRP1	57	0.0025836	0.424007
RPL26L1	57	1.706e-05	0.399024
DNMT3L	57	0.00016424	0.397568
DDOST	57	0.00018949	0.427332
ZDHHC17	57	0.00092722	0.390572
CASP7	57	0.00016358	0.417218
ERLIN2	56	0.00104651	0.425109
AHCY	56	0.00020851	0.429424
FLOT1	56	0.00045917	0.427841
CEP135	56	0.00017013	0.39087
MORF4L2	56	0.00013955	0.402958
PRDX6	56	0.00025613	0.420732
TMEM189-UBE2V1	56	0.00015118	0.415338
VDAC3	56	0.00020685	0.413333
PSMB6	56	7.624e-05	0.412243
PRKAR1A	56	0.00027208	0.430401
WHSC1L1	56	0.00011198	0.386958
MAP1B	56	0.00016782	0.424758
ITGB3	56	0.00043325	0.39836
PRPF6	56	3.896e-05	0.421522
FAU	56	2.337e-05	0.408173
PTK2B	56	0.00030783	0.406971
EEF1B2	55	0.00020448	0.443622
PARK7	55	0.00016981	0.423557
STRAP	55	0.00019157	0.433514
UFD1L	55	0.00018972	0.415386
EIF3B	55	7.895e-05	0.418383
DDX39B	55	0.00026459	0.416831
TERT	55	0.00010822	0.420585
SSR4	55	0.00014568	0.422264
RAB2A	55	0.00020032	0.407802
PTPRK	55	0.00141466	0.395165
PSME1	55	0.00020311	0.420437
HAUS2	55	0.00014193	0.404636
ECSIT	55	0.00054402	0.410268
MME	55	0.00175864	0.401474
DISC1	55	0.00028781	0.3977
FKBP4	55	0.00031805	0.435457
DSTN	54	0.00033556	0.406833
CSK	54	0.00027924	0.417024
CD44	54	0.00159586	0.421324
DDX19B	54	0.0010002	0.422413
OPTN	54	0.000395	0.410081
KEAP1	54	0.00037046	0.423757
COIL	54	0.00037514	0.417654
CEP126	54	0.00026516	0.395165
RPTOR	54	0.00019572	0.422711
RPN2	54	0.0001338	0.427129
RTCB	54	0.00016084	0.432523
PPP5C	54	0.00035715	0.441011
NFE2L2	54	0.00017252	0.410081
KARS	54	0.00013751	0.437629
RBPJ	54	0.00039686	0.414477
HCK	54	0.00056485	0.42167
HADHA	54	0.00016954	0.429271
FOXL1	54	0.00014919	0.379325
DUT	53	0.00022153	0.414
TCERG1	53	0.00011052	0.430813
PPARGC1A	53	9.02e-05	0.419603
EPB41L3	53	0.00021102	0.418091
RRP1B	53	0.00027002	0.424157
SSSCA1	53	0.00017744	0.391764
ASNS	53	0.00019423	0.420388
TANK	53	0.00022158	0.41887
ABI1	53	0.00017636	0.400267
KMT2B	53	0.00011358	0.391849
PICALM	53	0.00020805	0.429066
BCL10	53	0.00029879	0.406328
TUBB2B	53	0.00014329	0.428197
TARS	53	0.00017139	0.429015
SPP1	53	0.00058997	0.405229
NAT10	53	4.381e-05	0.434562
PRKCE	53	0.00021357	0.410221
PCK1	53	9.994e-05	0.420536
SF3B6	53	6.153e-05	0.41529
KRT1	53	0.00027356	0.427637
GTPBP4	53	6.64e-05	0.423907
CTPS1	53	0.00016895	0.426016
SUGT1	52	0.00018466	0.414716
IVNS1ABP	52	8.163e-05	0.413333
IPO7	52	0.00019296	0.431175
ATR	52	0.00017077	0.421917
TRAF4	52	0.00032021	0.40564
ASH2L	52	0.00010865	0.409474
TBL1XR1	52	7.122e-05	0.414859
SOCS3	52	0.00029558	0.417169
BCAR3	52	0.0001934	0.402102
UBTF	52	0.00011091	0.423657
RAB11A	52	0.00041728	0.425009
SUPT6H	52	0.00029505	0.415003
TFRC	52	0.00054281	0.443021
TGFB1	52	0.00116667	0.408822
SKIL	52	0.00039922	0.411395
SHMT2	52	0.00021967	0.432212
EIF3L	52	5.611e-05	0.416734
MTHFD1	52	0.00013566	0.435193
NCF1	52	0.0007458	0.38725
MBP	52	0.00033169	0.401833
NAP1L4	52	4.604e-05	0.417218
NCF1C	52	0.0007458	0.38725
FOXK2	52	0.00015801	0.399334
GTF2B	52	0.00055852	0.406925
FOXO3	52	9.433e-05	0.424357
FH	52	0.00023621	0.395208
HLA-A	52	0.00074851	0.421571
UBE2K	52	0.00032352	0.418724
ASF1A	51	5.352e-05	0.398979
CKAP4	51	0.00061093	0.421324
APBB1	51	0.00018952	0.418091
AP2A1	51	0.00017239	0.432367
SMC2	51	0.00020344	0.422314
ATP6V1A	51	0.00014389	0.410596
ATP2A2	51	0.00039062	0.423757
ATIC	51	0.00016705	0.416348
MED16	51	0.00015881	0.401743
CKAP5	51	0.00020962	0.427586
BUB3	51	6.275e-05	0.430556
NRIP1	51	0.00024427	0.419603
KIAA1549	51	0.00015227	0.409941
TJP1	51	0.00019584	0.421868
ZNF512B	51	0.00017867	0.402462
SSR1	51	0.00020438	0.416059
PSMB9	51	0.00013291	0.386127
PLG	51	0.00121506	0.405594
PEBP1	51	0.00040706	0.40771
MAP4	51	0.00016644	0.426218
TMOD3	51	6.146e-05	0.415147
TXLNA	51	0.00040252	0.409008
JAK3	51	0.00032029	0.391337
GFPT1	51	5.847e-05	0.411395
USP39	50	0.00013803	0.429938
CRMP1	50	0.00022139	0.417751
COPA	50	0.00017522	0.421373
ATP1B1	50	0.00041833	0.412669
ABCA1	50	0.00214501	0.39104
BCAP31	50	0.00039275	0.425009
TUBB6	50	0.00012534	0.41814
MED14	50	0.00014657	0.413952
RPAP3	50	0.00016985	0.426876
HAT1	50	3.473e-05	0.402102
VARS	50	0.00013375	0.432108
TNFRSF14	50	0.00034056	0.42521
SRSF9	50	5.261e-05	0.427434
TCOF1	50	8.87e-05	0.420536
SUMO3	50	0.00017894	0.412102
RPS6KA3	50	0.00024444	0.425713
RAB5A	50	0.00046691	0.398714
PIK3CA	50	0.00024089	0.423109
PFN1	50	0.00035146	0.433201
PFKP	50	7.904e-05	0.432419
FZR1	50	0.00022592	0.406971
RICTOR	50	0.00014	0.412954
UFM1	50	0.00018344	0.378566
MDM4	50	0.00010325	0.426572
MYO6	50	0.00016158	0.429578
HIST1H2BB	50	2.175e-05	0.405229
JMJD6	49	0.00013833	0.387751
TOPBP1	49	8.877e-05	0.40642
BUB1B	49	0.00016213	0.410549
UHRF2	49	7.565e-05	0.405229
FASLG	49	0.00028387	0.402417
MYL12A	49	0.00010953	0.423857
RBCK1	49	0.00027973	0.427281
ATP5O	49	0.00015701	0.423408
MVP	49	0.00048258	0.42642
USP2	49	0.00054152	0.419946
TOP2B	49	4.243e-05	0.420683
THRB	49	0.00010362	0.406695
CEP55	49	0.00024068	0.419065
RARS	49	7.353e-05	0.427383
ORC2	49	9.194e-05	0.397041
PPM1B	49	6.799e-05	0.414143
NFX1	49	8.374e-05	0.386044
SEPT2	49	0.00013021	0.428197
NDUFS3	49	0.00036478	0.420192
IFIT3	49	0.0002898	0.408034
GNB1	49	0.0003058	0.427586
GSN	49	0.00016073	0.436037
UBR4	49	0.0003665	0.42516
APOB	48	0.00214872	0.40116
NUP50	48	0.00017356	0.420634
CDK7	48	0.00027021	0.425361
BCAS2	48	0.00011224	0.416541
BCAR1	48	0.00015789	0.414
EPPK1	48	0.00022138	0.42963
POLR1C	48	0.00021383	0.416589
AIMP1	48	6.046e-05	0.419946
CEP290	48	0.00017108	0.403818
TAF1B	48	4.646e-05	0.404499
PINK1	48	0.00012048	0.414668
UBE2E1	48	0.00026147	0.410878
PRRC2A	48	0.00014975	0.417654
TRIM25	48	0.0001569	0.420486
TNFAIP3	48	0.00016817	0.411583
TIAL1	48	0.00016208	0.416156
RPS6KA1	48	0.00010617	0.427841
PSMD10	48	8.758e-05	0.406511
PRKCI	48	0.00022884	0.423907
POLR2G	48	0.00020664	0.406007
KDR	48	0.00046671	0.406833
HLA-DRA	48	0.00149383	0.374583
NUFIP1	48	0.00057344	0.392705
HBA2	48	0.00104573	0.413143
HBA1	48	0.00104573	0.413143
TUBGCP4	48	0.00028502	0.396778
CACNA1A	47	0.00037188	0.383655
EIF4E	47	0.00018371	0.420339
DNM1	47	0.00020554	0.412764
RBFOX2	47	0.00023212	0.413523
ARF1	47	0.00042154	0.403682
CRYAB	47	0.00058085	0.418091
DHX30	47	7.97e-05	0.42835
UBE4B	47	0.00017074	0.418578
HSPA4L	47	0.00016252	0.409707
SYVN1	47	0.00028305	0.40771
PDIA4	47	0.00025548	0.417315
VPS26A	47	0.00016218	0.404045
PIAS2	47	0.00023164	0.413096
UBE2V1	47	7.943e-05	0.409334
BANF1	47	6.974e-05	0.39378
ITSN1	47	0.0001706	0.387667
ERBIN	47	0.000446	0.413143
SOS1	47	0.00013952	0.419359
BANP	47	0.00043142	0.401833
MCL1	47	0.00036657	0.407941
HP1BP3	47	4.388e-05	0.428708
STMN1	47	0.00014941	0.420388
KRT10	47	7.337e-05	0.42516
KRT8	47	0.00018258	0.429219
GNAS	47	0.00026096	0.415578
RSL1D1	47	6.086e-05	0.430504
ECHS1	46	0.0001339	0.421127
ALK	46	0.00024039	0.403727
FGFR1OP	46	0.00027488	0.394298
CIRBP	46	6.82e-05	0.425613
BAD	46	0.00023659	0.403501
MED24	46	0.00011743	0.400803
ACTR3	46	9.404e-05	0.428299
SART3	46	9.869e-05	0.416976
MED17	46	7.501e-05	0.404363
WASL	46	0.0002183	0.421967
TLR4	46	0.00277601	0.394861
STAT5B	46	0.00019332	0.423657
RTN4	46	0.0002894	0.411536
SDHB	46	0.000319	0.393996
SREBF1	46	9.144e-05	0.401967
SNRPF	46	6.956e-05	0.416059
PTCH1	46	0.00168901	0.389515
RDX	46	0.00020032	0.42276
PKN1	46	0.00020147	0.414381
PPP1R3A	46	0.00017995	0.365819
HIST1H2BA	46	8.112e-05	0.398537
TOLLIP	46	0.00035399	0.400758
DNAJB11	46	0.00046913	0.433985
TRIM33	46	0.00010612	0.416445
LARS	46	0.0001247	0.424708
MYL6	46	8.059e-05	0.429373
TRAF3IP1	46	0.00046766	0.410596
FOXO1	46	6.954e-05	0.415338
FKBP1A	46	0.00030797	0.405274
CHMP4B	46	0.0001773	0.401608
GEMIN5	46	0.00016381	0.41196
CARS	46	0.00015221	0.41163
CAMK2A	45	0.0001551	0.403139
EIF4A2	45	9.326e-05	0.403682
WWP2	45	0.00030696	0.415626
CEP152	45	9.549e-05	0.390488
AKT2	45	0.00034297	0.429271
ATP6AP2	45	0.00047082	0.376939
RAPGEF2	45	7.613e-05	0.399378
BAG4	45	0.00033737	0.408173
USP14	45	6.472e-05	0.414238
HIST1H2AK	45	6.912e-05	0.404045
NR1H2	45	0.00048817	0.388085
BECN1	45	0.00025612	0.420093
IRS2	45	0.00022437	0.426926
KAT6A	45	4.425e-05	0.394948
NSFL1C	45	0.00015113	0.408729
PSEN2	45	0.00035084	0.402327
MAPK7	45	0.00015576	0.433253
RBBP5	45	0.00012807	0.40409
PFAS	45	0.00029588	0.409008
NFKBIE	45	0.00015275	0.413048
NDUFS1	45	0.00012476	0.421818
MAGEA11	45	0.00022511	0.390997
AGO4	45	4.584e-05	0.398979
ITGB2	45	0.00046339	0.396341
HDLBP	45	0.00016556	0.423308
EIF3K	45	5.993e-05	0.403184
PDCD4	45	0.00011278	0.411583
RUNX2	45	6.944e-05	0.400178
MAPK8IP2	44	0.00025917	0.408869
USP19	44	0.00017604	0.414764
ADRBK1	44	0.0007517	0.408869
ADAR	44	6.417e-05	0.418626
NUP93	44	0.00012832	0.420388
UNC119	44	0.00020838	0.388673
HIST1H2AM	44	6.606e-05	0.40341
HIST1H2AL	44	6.606e-05	0.40341
HIST1H2AI	44	6.606e-05	0.40341
CPSF7	44	6.243e-05	0.418626
HIST1H2AG	44	6.606e-05	0.40341
NSD1	44	5.969e-05	0.380127
TCEB2	44	0.00012162	0.39792
SORT1	44	0.0003149	0.395208
ATAD3A	44	5.826e-05	0.426774
PLAUR	44	0.000961	0.376033
RAP1A	44	0.00024743	0.416783
SERPINA1	44	0.00126313	0.384476
PGD	44	0.00020643	0.399556
NMT1	44	9.926e-05	0.416445
UIMC1	44	0.00015264	0.414333
MED15	44	8.303e-05	0.38922
LMAN1	44	0.00015969	0.42029
SEC61A1	44	0.00013892	0.416396
KPNA3	44	8.787e-05	0.411771
GFAP	44	0.00020991	0.416734
GATA1	44	0.00010334	0.402913
GART	44	0.00018702	0.420831
BRAF	43	6.351e-05	0.402192
STOM	43	0.00017403	0.429373
ALDOC	43	0.00013894	0.413761
LOC100996724	43	0.00024716	0.388547
MED6	43	6.393e-05	0.39087
G3BP2	43	3.998e-05	0.42642
PDE4DIP	43	0.00024716	0.388547
RB1CC1	43	0.00022316	0.401474
MED21	43	5.168e-05	0.393565
SLC9A3R1	43	0.00022747	0.411206
FUBP3	43	7.97e-05	0.426066
EIF2S2	43	0.000115	0.428605
BHLHE40	43	0.00018651	0.403184
COPS3	43	8.474e-05	0.426521
WNK1	43	0.0001222	0.413714
VASP	43	0.00016802	0.418091
FADD	43	0.00015954	0.403637
NIF3L1	43	0.00016099	0.390827
CTNNBL1	43	6.574e-05	0.39836
SRSF6	43	2.323e-05	0.432212
RCC2	43	6.198e-05	0.418237
UNC45A	43	0.00011539	0.420241
ST13	43	0.00032373	0.429835
SNRPB2	43	5.116e-05	0.409194
FSCN1	43	7.325e-05	0.422611
DPPA4	43	0.00015729	0.399956
PFDN2	43	0.00010931	0.406741
KHDRBS2	43	8.455e-05	0.395295
SRRT	43	6.516e-05	0.431641
LARP7	43	5.975e-05	0.41931
MDFI	43	0.00031027	0.383614
HIST1H1B	43	7.33e-05	0.410596
F2	43	0.00158152	0.36382
ATN1	42	0.00033717	0.38796
CCDC85B	42	0.00018941	0.373727
FMNL1	42	0.00011671	0.403727
KLF5	42	7.49e-05	0.411866
TRIM23	42	0.00021825	0.386417
ACTN2	42	0.00020332	0.389473
LAMTOR5	42	0.00036452	0.395992
MED10	42	4.909e-05	0.37272
BCL3	42	6.888e-05	0.412669
NDEL1	42	0.00019464	0.4
RNF8	42	0.00012698	0.398625
TSC2	42	7.841e-05	0.42642
EIF3G	42	8.624e-05	0.414
DYNLT1	42	0.00026401	0.409241
HDAC8	42	4.122e-05	0.386916
SOD2	42	0.0001448	0.400803
ATXN7	42	0.00028374	0.397304
PPARA	42	0.00014999	0.394601
POU2F1	42	0.00015951	0.417169
NME1	42	0.00013377	0.399289
PDE4D	42	0.00038637	0.40859
HDAC7	42	0.00012459	0.415386
MEF2A	42	0.00013829	0.39621
MDH2	42	9.6e-05	0.41248
ITSN2	42	0.00019062	0.385713
STOML2	42	0.00011446	0.426167
PACSIN3	42	0.00014017	0.402102
PGAM5	42	7.156e-05	0.426724
TNPO1	42	9.814e-05	0.417315
GDI1	42	0.00016734	0.409521
FABP5	42	8.474e-05	0.401294
DICER1	42	0.00018636	0.409427
METTL21B	42	6.509e-05	0.393953
PRDX5	41	8.277e-05	0.394861
ANKRD28	41	0.00020066	0.406971
CD40	41	0.0001323	0.395208
TNIP1	41	0.00027367	0.404136
UBA2	41	7.787e-05	0.417073
DNAJB6	41	0.00011422	0.429168
EEF1E1	41	2.978e-05	0.388589
RAB1B	41	0.00013036	0.404181
WDR82	41	0.00012591	0.417897
UBE2M	41	0.00012409	0.431434
CFLAR	41	6.265e-05	0.398537
TMEM135	41	0.00011422	0.429168
NR0B2	41	0.00013436	0.413143
NUP214	41	9.712e-05	0.421472
STRN	41	8.692e-05	0.412954
ATF7IP	41	0.00021603	0.4
CCDC88A	41	0.00015002	0.413428
DDX27	41	1.781e-05	0.407848
CDCA8	41	0.00024438	0.387709
EXOSC10	41	0.00032155	0.411724
LRRC59	41	0.00011442	0.433305
RBBP6	41	0.00017919	0.418285
EXOSC4	41	0.00011029	0.399334
PFKL	41	0.00012348	0.432575
PKN2	41	0.00010559	0.401653
PPP4C	41	0.00013973	0.411018
PPID	41	8.056e-05	0.439609
CYCS	41	0.00032494	0.404363
FOXK1	41	0.00010955	0.409101
MLF1	41	0.000118	0.388547
ING1	41	3.844e-05	0.410081
KRT9	41	9.762e-05	0.41163
KRAS	41	0.00022236	0.406465
GNAI3	41	0.00050664	0.423657
ASB9	41	5.409e-05	0.38069
RBPMS	40	0.00026466	0.38427
RAVER1	40	0.00010304	0.408173
BID	40	0.00010065	0.39836
PRDX3	40	0.00050712	0.413143
CDC25A	40	0.00011936	0.427281
ACTC1	40	9.758e-05	0.412764
CLTA	40	0.00011488	0.426016
AKAP8	40	3.891e-05	0.414764
ACAT1	40	9.768e-05	0.412007
ARPC2	40	5.829e-05	0.417121
SOCS1	40	0.0001165	0.403275
XPO5	40	0.00019022	0.421324
TAGLN	40	0.00015245	0.371219
THOC2	40	9.81e-05	0.405732
SPR	40	7.892e-05	0.379205
NSUN2	40	0.00010017	0.41248
BCOR	40	0.00011275	0.404545
PIH1D1	40	0.00010202	0.385878
ERRFI1	40	8.992e-05	0.406879
OXCT1	40	0.00016218	0.396691
MKI67	40	9.863e-05	0.420044
ATAD2	40	1.405e-05	0.381903
UPF2	40	0.00017932	0.398758
FLII	40	6.43e-05	0.420634
FOXG1	40	0.00012326	0.389473
NUDCD3	40	0.00011483	0.401608
CSTF2	40	0.0001365	0.414668
CAPNS1	40	0.0001788	0.404499
BRMS1	39	0.00012897	0.413523
RRP12	39	1.764e-05	0.414955
RCOR1	39	4.451e-05	0.382961
CDC34	39	0.00010957	0.407479
AKR1B1	39	0.00018711	0.398184
COPG1	39	0.00012736	0.42167
POLR1B	39	8.096e-05	0.412669
ARPC3	39	0.00011045	0.404408
SMC4	39	8.152e-05	0.415147
TCEA1P2	39	0.00013949	0.401205
USP8	39	0.00021232	0.418773
YEATS4	39	7.072e-05	0.393435
WDR48	39	0.00010737	0.415482
TCEA1	39	0.00013949	0.401205
SNX2	39	0.00015565	0.400579
SAT1	39	0.00018846	0.391977
S100A8	39	0.00012529	0.425965
RET	39	0.0001466	0.416252
MLLT4	39	0.00027734	0.417848
PHF20L1	39	4.257e-05	0.386791
GNAI1	39	0.0003183	0.385713
HTRA2	39	9.714e-05	0.409707
U2SURP	39	1.547e-05	0.410081
NELFB	39	6.606e-05	0.415963
CAPN2	39	0.00032376	0.412196
POP1	38	3.979e-05	0.413143
ENO3	38	7.308e-05	0.387667
ASB16	38	4.259e-05	0.382269
CRIP1	38	0.00012447	0.368216
ATG12	38	0.00012661	0.397392
PSTPIP1	38	6.705e-05	0.375091
H1FX	38	4.376e-05	0.407386
TSC1	38	0.00012758	0.405183
DAP3	38	0.00011048	0.420929
TIA1	38	0.00015371	0.413619
THBS1	38	0.00045279	0.37789
TFAP2C	38	0.0005146	0.398891
HNF1A	38	0.00047877	0.402012
SEC13	38	8.887e-05	0.417605
RNF4	38	5.18e-05	0.400803
SERPINB5	38	0.00022779	0.399068
RNF31	38	0.00014074	0.418091
POLR2H	38	0.0001053	0.402733
PDGFRA	38	0.00018473	0.406328
PAFAH1B2	38	6.797e-05	0.404499
MMP9	38	0.00211391	0.358882
FTH1	38	0.00015368	0.406925
GORASP2	38	0.00026183	0.417557
FGF2	38	0.00176295	0.369541
DDIT3	38	0.00016898	0.395469
SMCHD1	38	2.643e-05	0.407848
CAMK2G	37	0.00012811	0.402102
EIF5	37	7.884e-05	0.424007
MID2	37	0.00018009	0.378287
OS9	37	0.00049687	0.394688
CCNT1	37	8.364e-05	0.407617
CCNC	37	0.00011109	0.391295
RASSF1	37	0.00024258	0.400892
PSIP1	37	3.268e-05	0.402102
AGTR1	37	0.00148925	0.377731
COL1A1	37	0.00040174	0.38922
TRIP12	37	0.00010752	0.411348
FIP1L1	37	7.493e-05	0.428912
MAPKAPK2	37	0.00010816	0.413143
MED7	37	5.554e-05	0.386916
LONP1	37	0.00022633	0.414764
TAF1A	37	1.082e-05	0.376466
TPT1	37	0.00012351	0.427383
MTA3	37	9.129e-05	0.399245
SHMT1	37	4.548e-05	0.364263
VPS35	37	0.00013128	0.422711
MRGBP	37	7.828e-05	0.38922
RAP1GDS1	37	0.00011396	0.406971
OAT	37	9.694e-05	0.413809
PPP1R2	37	0.00016183	0.383451
MAP2	37	0.00011043	0.419799
NDUFV1	37	6.617e-05	0.380328
MYD88	37	0.00029311	0.386251
AGO3	37	6.692e-05	0.404864
ITGAV	37	0.00033741	0.40771
FKBP3	37	3.876e-05	0.412717
FGFR1	37	0.00033138	0.394298
MTCH2	37	0.00028845	0.416107
FANCC	37	0.00021426	0.404
CASP6	37	7.88e-05	0.402552
RCHY1	37	0.0004151	0.400134
EIF2S3	36	3.214e-05	0.4113
ANXA11	36	0.00013984	0.401922
CLIC1	36	0.0007443	0.414477
ATP4A	36	0.00025736	0.370035
NR1H3	36	7.273e-05	0.39391
BCL2L11	36	0.00030753	0.407386
GLYR1	36	2.733e-05	0.392534
SEC24C	36	7.132e-05	0.426926
TECR	36	6.294e-05	0.417848
QKI	36	0.00020265	0.411112
PALB2	36	0.00013845	0.382716
STK4	36	0.00014559	0.399733
SH3GL1	36	0.0002967	0.393048
SRP72	36	0.00011139	0.413001
CCL5	36	0.00123282	0.369845
RECQL	36	4.156e-05	0.392834
PDHA1	36	9.121e-05	0.407987
ORC4	36	4.703e-05	0.398228
PRKCG	36	0.00011966	0.402688
PRKAA2	36	0.00023051	0.391125
MAT2A	36	3.433e-05	0.416831
STRN3	36	0.00011433	0.401294
LRP2	36	0.0004001	0.383819
LMO7	36	5.932e-05	0.40341
IRF1	36	3.212e-05	0.394169
ID2	36	8.009e-05	0.400713
HMGB2	36	6.307e-05	0.42531
GRIN1	36	0.00015353	0.386916
FES	36	0.00011525	0.409427
DAB1	36	0.00024314	0.389093
CAT	36	0.0002275	0.420634
EPHA2	35	0.00014683	0.419652
MPRIP	35	0.00015845	0.405594
GADD45G	35	0.00014453	0.407941
RAB10	35	7.614e-05	0.412385
METTL18	35	4.432e-05	0.379285
ANXA5	35	0.0002048	0.424457
ZHX1	35	0.00011883	0.402913
BIN1	35	0.00011233	0.400535
AP2A2	35	8.555e-05	0.432784
PRDX4	35	0.00033916	0.408962
TRIP4	35	7.295e-05	0.406649
TUBB1	35	0.00024605	0.409567
TJP2	35	6.787e-05	0.40409
GRPEL1	35	0.00010361	0.403591
CEP63	35	9.547e-05	0.37034
HAP1	35	0.0001904	0.384846
USO1	35	0.00014826	0.414955
PIR	35	8.29e-05	0.368934
TTK	35	0.00011042	0.422959
NUMB	35	9.58e-05	0.415915
SNX6	35	0.0001279	0.399156
RHOU	35	0.00034907	0.374779
CXCR4	35	0.00028341	0.385547
NR2C2	35	5.85e-05	0.406144
TBXA2R	35	0.00028611	0.37564
SLC3A2	35	6.725e-05	0.41814
MAP2K7	35	0.00011735	0.404727
BCAS3	35	7.537e-05	0.40116
PLS3	35	7.907e-05	0.418578
NSF	35	0.00014005	0.42162
NEDD9	35	0.00010735	0.398449
PARD6A	35	0.00013888	0.401653
PCNT	35	0.0001154	0.394125
MNAT1	35	8.498e-05	0.396384
MYO1E	35	4.893e-05	0.390827
EDC4	35	9.059e-05	0.407802
WDR36	35	0.00014434	0.402462
GRIP1	35	7.938e-05	0.389895
CASP4	35	8.894e-05	0.398184
PASK	34	0.00013295	0.401967
DYNC1I1	34	0.00010944	0.393349
BTF3	34	0.00020466	0.41975
APLP1	34	9.771e-05	0.383205
PGRMC1	34	9.875e-05	0.402372
MAP3K8	34	1.736e-05	0.402642
C14orf1	34	6.968e-05	0.377414
SORBS3	34	0.00016244	0.382065
AARS	34	5.028e-05	0.409474
ARPC4	34	6.945e-05	0.403003
SAE1	34	6.493e-05	0.424207
NUP155	34	0.00010505	0.420093
NPEPPS	34	8.147e-05	0.407617
CDYL	34	0.00010223	0.374116
NAA10	34	0.0002505	0.404136
CASK	34	0.00046008	0.398052
VRK1	34	2.783e-05	0.388967
EDF1	34	4.387e-05	0.393651
TIAM1	34	0.00013644	0.394082
TROVE2	34	2.113e-05	0.390149
UGGT1	34	0.00022024	0.402147
OSGEP	34	0.00010265	0.381377
RYK	34	0.00086698	0.398802
DNAJA4	34	4.835e-05	0.393823
RAP1B	34	0.00021712	0.413143
COPS7A	34	3.057e-05	0.400892
OLA1	34	4.641e-05	0.418383
EPN1	34	0.00025087	0.417799
STRN4	34	6.197e-05	0.401878
PRMT2	34	8.525e-05	0.397129
GOT1	34	0.00012112	0.373029
GNAQ	34	0.00075315	0.365707
GSK3A	34	7.943e-05	0.39121
ETF1	34	8.116e-05	0.402237
CYLD	34	8.295e-05	0.402913
CASP9	34	9.761e-05	0.400713
NUP205	33	8.549e-05	0.414955
TIRAP	33	0.00018696	0.386085
CBR1	33	0.00018467	0.424207
ACVR1	33	0.00052584	0.370913
ACP1	33	0.00018968	0.410221
SEPT9	33	0.00012975	0.425915
ACAT2	33	7.741e-05	0.402282
APPBP2	33	0.00036706	0.398979
TADA3	33	5.868e-05	0.397348
PIAS3	33	4.32e-05	0.398008
UBAP2L	33	0.00015782	0.421769
EIF5B	33	7.204e-05	0.415386
MED25	33	2.947e-05	0.379886
CDC45	33	0.00010317	0.401563
BAP1	33	5.7e-05	0.393479
DYRK2	33	7.293e-05	0.403909
BRCC3	33	4.062e-05	0.409008
TNFRSF10D	33	2.319e-05	0.371181
DERL1	33	0.00019255	0.403546
MARK4	33	4.26e-05	0.392063
SH3GL2	33	0.00059584	0.392662
SRP9	33	5.738e-05	0.38675
RXRB	33	6.784e-05	0.376308
MAPK10	33	0.00025622	0.401878
EIF3CL	33	4.74e-06	0.373145
RAD52	33	3.185e-05	0.407433
PIM1	33	8.431e-05	0.407202
EGLN1	33	8.943e-05	0.383042
PGAM1	33	7.119e-05	0.399378
PRKAB2	33	0.00013784	0.375718
PPP1R8	33	7.767e-05	0.403139
LUC7L3	33	2.896e-05	0.412102
WBP11	33	0.0004272	0.409288
SRP9P1	33	5.738e-05	0.38675
NDUFA9	33	0.00010803	0.407848
CAPRIN1	33	2.277e-05	0.427586
LTBR	33	0.00022685	0.376466
JUND	33	3.462e-05	0.398891
ITGB4	33	0.00010818	0.409894
LYPD3	33	0.00017895	0.366154
CASP1	33	0.00017869	0.395165
POC1A	33	7.746e-05	0.366042
SIN3B	32	3.416e-05	0.389895
DOK1	32	3.878e-05	0.376426
ARNT	32	0.00014885	0.389557
KDM4B	32	2.14e-05	0.379886
TPX2	32	4.777e-05	0.393048
SEPT7	32	2.807e-05	0.396953
CD14	32	0.00024508	0.351756
YTHDC1	32	0.00015819	0.387166
ACTR1A	32	4.245e-05	0.408869
MCRS1	32	4.389e-05	0.390233
NDC80	32	7.732e-05	0.406328
NR1H4	32	1.138e-05	0.394125
MED13	32	2.487e-05	0.374661
MAD1L1	32	8.975e-05	0.397304
CCDC6	32	4.105e-05	0.410784
YARS	32	0.00011211	0.426117
MRPS9	32	3.168e-05	0.412527
CSDE1	32	4.666e-05	0.415434
TNNT1	32	0.00015588	0.390106
TAF10	32	4.773e-05	0.396909
SYN1	32	9.214e-05	0.396035
PRMT8	32	1.668e-05	0.380449
MAP2K4	32	5.666e-05	0.402733
SDC2	32	0.00061373	0.38061
NUP133	32	4.386e-05	0.407617
ROCK1	32	6.671e-05	0.406603
RAB5B	32	0.00013557	0.382838
PLAT	32	0.00044176	0.378248
WDYHV1	32	9.725e-05	0.378805
PRKD1	32	4.918e-05	0.406557
PPP3CA	32	7.521e-05	0.400223
POLR2D	32	4.833e-05	0.391167
PAFAH1B3	32	9.969e-05	0.406052
MYO1B	32	1.593e-05	0.415674
NDUFA2	32	0.00012757	0.397656
DNTTIP2	32	4.889e-05	0.383451
MAGEA1	32	0.00016091	0.384969
LIMK1	32	0.00014866	0.40532
LGALS8	32	0.00041381	0.393134
JUNB	32	6.009e-05	0.400312
ITGA5	32	0.00024494	0.402102
FAM9B	32	0.00014936	0.370798
SBDS	32	7.818e-05	0.383696
INPP5D	32	6.011e-05	0.372218
LAMP2	32	7.18e-05	0.401205
KRT16	32	7.925e-05	0.40808
COMMD1	32	3.24e-05	0.41462
HIST1H1E	32	3.082e-05	0.389388
GSTP1	32	0.00011921	0.414955
GSPT1	32	4.961e-05	0.410221
EIF5AL1	32	5.04e-05	0.422165
FHL1	32	0.00014777	0.413143
TIMM13	32	5.648e-05	0.402282
CTSD	32	0.0001182	0.406282
DNAJB4	31	6.842e-05	0.394774
SCRIB	31	0.00010584	0.416156
CSTB	31	9.108e-05	0.390445
MAST1	31	0.00015321	0.3956
CDC6	31	0.00013761	0.395035
HABP4	31	2.908e-05	0.392576
AHR	31	6.448e-05	0.402778
YKT6	31	0.00014545	0.36478
HEXIM1	31	4.676e-05	0.406649
USP16	31	2.465e-05	0.390106
COL4A1	31	0.00105899	0.381013
AUP1	31	0.00014621	0.403863
EIF2A	31	4.441e-05	0.401833
CEP89	31	4.498e-05	0.368443
TELO2	31	4.483e-05	0.409754
CEP350	31	7.829e-05	0.389262
SAFB2	31	0.00019852	0.405503
L3MBTL3	31	8.734e-05	0.378367
ARID1A	31	1.86e-05	0.405274
USF1	31	3.488e-05	0.407941
FKBPL	31	6.778e-05	0.4163
ZMYM2	31	4.566e-05	0.387709
RRM1	31	3.794e-05	0.408265
PSPC1	31	5.175e-05	0.413619
RBM28	31	1.834e-05	0.408312
PRNP	31	0.00016092	0.403456
PKP2	31	7.424e-05	0.399068
YTHDF2	31	4.565e-05	0.432784
MED9	31	5.711e-05	0.385961
POLR2F	31	0.00021254	0.389895
EXOSC1	31	8.888e-05	0.38292
COX2	31	4.631e-05	0.403049
ASB2	31	2.107e-05	0.400981
ITGB5	31	0.00011513	0.375483
KRT6A	31	5.527e-05	0.404773
GTF2H1	31	8.393e-05	0.406328
DIMT1	31	5.831e-05	0.407987
PSMA8	31	1.119e-05	0.375091
CAMK2D	30	0.00011043	0.391465
HECTD1	30	0.00037539	0.40341
TXN2	30	8.308e-05	0.393522
EIF4G2	30	5.604e-05	0.415338
BLK	30	6.487e-05	0.387709
MAP3K2	30	2.128e-05	0.395817
NAF1	30	8.078e-05	0.380127
CFL2	30	4.336e-05	0.37781
CCNH	30	2.376e-05	0.40341
SLC25A4	30	3.697e-05	0.394904
ADSL	30	8.635e-05	0.3996
CCR5	30	0.00043135	0.362098
DNM1L	30	0.00020073	0.415626
ARNT2	30	0.00012429	0.382798
PUM1	30	6.503e-05	0.414143
SARNP	30	0.0001816	0.405777
PICK1	30	0.00019647	0.37191
MAP4K4	30	0.00010813	0.415051
UBXN6	30	2.759e-05	0.40049
ZFP36	30	5.553e-05	0.408312
ZAP70	30	8.954e-05	0.40341
PRPF4B	30	1.08e-05	0.41462
VKORC1	30	0.00054484	0.362098
KLC2	30	0.00014112	0.409661
TDG	30	2.538e-05	0.399422
GNB4	30	9.976e-05	0.395861
TOMM22	30	3.052e-05	0.389135
CEP72	30	4.748e-05	0.379285
PLD2	30	6.65e-05	0.409987
UFC1	30	4.007e-05	0.366901
PECAM1	30	0.00014251	0.374583
PRKCSH	30	5.519e-05	0.415338
MUC1	30	5.285e-05	0.413191
PLEKHA5	30	0.00015431	0.387166
PAWR	30	7.046e-05	0.3907
MMP2	30	0.00109288	0.371334
TAGLN3	30	4.217e-05	0.363122
ABLIM1	30	6.845e-05	0.41248
IRAK2	30	0.0001567	0.3865
GRB7	30	5.232e-05	0.394991
BRD1	30	1.152e-05	0.35996
TTLL12	29	6.179e-05	0.403863
SFXN1	29	7.209e-05	0.40341
APEH	29	7.852e-05	0.389515
USP20	29	0.00012645	0.382187
CDK3	29	0.00026527	0.409847
CDC25B	29	1.748e-05	0.408173
ALDH1B1	29	0.0003636	0.409754
ALDH2	29	0.0001928	0.406879
AK2	29	3.163e-05	0.403139
RBM48	29	7.117e-05	0.364558
TSSK6	29	1.114e-05	0.389684
BASP1	29	2.403e-05	0.391082
NCAPD2	29	4.479e-05	0.402462
ZFYVE9	29	7.996e-05	0.38427
DDX54	29	4.874e-05	0.417363
VEGFA	29	0.00116281	0.371219
UGP2	29	7.104e-05	0.401071
PJA1	29	9.916e-05	0.394774
TYMS	29	6.317e-05	0.370569
SLC25A1	29	7.273e-05	0.405915
SLC9A1	29	0.0008786	0.381458
SRP68	29	3.202e-05	0.40771
CEP57L1	29	0.00011648	0.365893
LUZP6	29	6.218e-05	0.392748
NDE1	29	9.912e-05	0.392191
TRMT112	29	2.217e-05	0.38592
FOXP3	29	4.919e-05	0.378367
LSM8	29	9.872e-05	0.363636
MRPS23	29	1.71e-05	0.408219
RAB14	29	6.427e-05	0.411253
MAGEA6	29	5.033e-05	0.373455
ITGA2	29	0.00021726	0.359996
KNG1	29	0.00050171	0.382269
GOT2	29	6.298e-05	0.398891
RNF32	29	7.81e-05	0.37513
FBXW8	29	1.574e-05	0.407848
TICAM1	29	8.401e-05	0.378646
KANK2	29	0.00010747	0.405274
FGR	29	0.00031422	0.396472
EPS8	29	0.00012158	0.386293
DMD	29	0.00042571	0.399733
MTPN	29	6.218e-05	0.392748
NUDCD2	29	8.532e-05	0.37781
FLT1	29	0.00039733	0.375718
NCAPH	29	4.885e-05	0.409148
CKMT1A	28	2.423e-05	0.401519
SLX1A	28	1.846e-05	0.38166
EIF5A	28	4.279e-05	0.419848
SEC61B	28	8.687e-05	0.40711
NES	28	0.00010019	0.404408
CRP	28	0.00028667	0.366864
GNA13	28	0.00019503	0.392534
CDC25C	28	1.982e-05	0.408126
DDX42	28	3.726e-05	0.411159
COL4A2	28	0.00064725	0.392791
CKMT1B	28	2.423e-05	0.401519
NAA15	28	0.00017059	0.403049
MED27	28	3.876e-05	0.367501
CDK5RAP3	28	6.181e-05	0.397568
WASF1	28	0.00010875	0.395339
SLX1B	28	1.846e-05	0.38166
SPOP	28	4.504e-05	0.399289
UQCRC1	28	2.742e-05	0.403637
TGFB1I1	28	0.00012714	0.400535
RHEB	28	0.00012229	0.367652
PTGER3	28	0.00021844	0.356004
LAMA1	28	0.00038867	0.392705
SGTB	28	8.12e-05	0.366864
PFKFB2	28	2.027e-05	0.381296
HACD3	28	3.969e-05	0.410362
NELFCD	28	0.00010401	0.394341
PPL	28	0.00015761	0.391935
NEFL	28	0.00014116	0.405137
PAX6	28	7.168e-05	0.371143
NR3C2	28	2.642e-05	0.391465
MAP3K11	28	7.904e-05	0.406511
DRG1	28	2.712e-05	0.420241
INSIG2	28	2.559e-05	0.374427
ITGA6	28	0.00023501	0.39087
CDCA2	28	1.768e-05	0.36784
KRT19	28	8.583e-05	0.415003
HLA-DPA1	28	0.00033048	0.35059
FGA	28	0.00020156	0.379205
HIVEP1	28	0.00012385	0.393134
FBLN1	28	0.00042267	0.397392
DLG3	28	0.00015305	0.371143
HSPBP1	28	6.162e-05	0.412291
DAG1	28	0.00015672	0.379405
USP49	27	3.414e-05	0.377652
DMWD	27	7.355e-05	0.386667
SPG20	27	2.725e-05	0.404
CDK11B	27	2.322e-05	0.416928
AKAP13	27	8.752e-05	0.406603
AGL	27	0.00013362	0.391465
ATP5L	27	4.324e-05	0.384065
COL1A2	27	0.00021266	0.386293
ASCC2	27	9.977e-05	0.3996
TATDN1	27	4.51e-05	0.357384
PQBP1	27	6.613e-05	0.405229
GRWD1	27	3.107e-05	0.413952
TMEM25	27	0.00041639	0.367426
SHARPIN	27	0.00016106	0.366042
THOC7	27	8.645e-05	0.364558
CLTCL1	27	5.551e-05	0.41163
GMPS	27	3.92e-05	0.414955
THOC5	27	4.099e-05	0.375561
TTR	27	0.00015415	0.39726
NOD2	27	5.315e-05	0.383083
TRAF5	27	2.871e-05	0.374155
TLR2	27	0.00011968	0.377969
WDR18	27	1.34e-05	0.399733
DCP1A	27	4.769e-05	0.401519
SP100	27	7.408e-05	0.371526
SNRPN	27	4.174e-05	0.403637
CHFR	27	4.031e-05	0.391849
MAPK11	27	6.057e-05	0.404773
RBM3	27	5.81e-06	0.408265
NEK8	27	5.287e-05	0.389768
RANBP1	27	5.177e-05	0.415771
PFN2	27	0.00031469	0.394515
YTHDF1	27	5.837e-05	0.415771
POLR2J	27	5.124e-05	0.38592
POLR2L	27	4.56e-05	0.37789
GLOD4	27	6.523e-05	0.386085
DNAJC10	27	5.514e-05	0.410221
PPHLN1	27	9.122e-05	0.399422
NDUFS2	27	5.802e-05	0.410268
PPIL3	27	8.139e-05	0.369199
ITPR1	27	0.00012145	0.387
IGFBP3	27	0.00041605	0.390064
HSPG2	27	0.0004038	0.399245
LDLR	27	0.00029228	0.365262
KTN1	27	0.00014514	0.402868
HPRT1	27	3.612e-05	0.396559
HMOX2	27	0.00019022	0.388044
IDE	27	0.00010553	0.407895
GPX4	27	1.746e-05	0.359456
FGB	27	0.00013456	0.372758
FARSA	27	6.903e-05	0.421967
STX12	27	0.00011775	0.371104
FMR1	27	7.152e-05	0.409241
TNS2	27	0.00012216	0.37789
CTSB	27	0.00068077	0.39036
CTSG	27	0.00026115	0.369769
PTPN23	27	7.475e-05	0.415578
LPAR1	26	0.00025353	0.344576
EPHB2	26	0.00020149	0.369807
ATXN2L	26	2.371e-05	0.400535
IGF2BP2	26	1.65e-05	0.399556
ATP2B4	26	0.00015539	0.3769
HIST1H2BK	26	5.62e-06	0.374077
ZC3H11A	26	4.194e-05	0.390191
TTI1	26	3.366e-05	0.399911
PPIF	26	7.133e-05	0.374779
BAG5	26	6.542e-05	0.393522
SLIRP	26	3.561e-05	0.38464
TOMM20	26	0.00058074	0.381538
GSTO1	26	0.00014231	0.411018
LMO4	26	6.179e-05	0.387918
EP400	26	3.414e-05	0.398493
YLPM1	26	2.633e-05	0.393134
SH3GL3	26	0.00018566	0.379685
CLIP1	26	2.413e-05	0.379645
ARFGAP1	26	0.00019749	0.394298
HEMGN	26	5.709e-05	0.39087
PLAU	26	0.00024217	0.350624
NPHP4	26	2.207e-05	0.368858
PGM1	26	3.96e-05	0.398758
CWC15	26	2.818e-05	0.395295
PPP2R5D	26	0.00010466	0.390233
MMP3	26	0.000677	0.340885
NDN	26	0.00014442	0.385878
LGALS9	26	0.00022686	0.378845
GNL2	26	1.259e-05	0.414286
MKNK2	26	4.384e-05	0.394688
HIST1H1D	26	3.48e-05	0.405823
ESRRA	26	3.889e-05	0.382594
DCN	26	0.0003934	0.384928
PPP1R13B	26	6.357e-05	0.385837
UBR2	25	0.00013436	0.379365
EGR1	25	4.129e-05	0.38166
EFNB2	25	0.00020248	0.358096
SYNE2	25	3.843e-05	0.394039
C11orf58	25	6.916e-05	0.382635
RALBP1	25	8.487e-05	0.389051
APRT	25	5.205e-05	0.409055
COPS8	25	1.098e-05	0.394212
CS	25	2.312e-05	0.400312
CPT1A	25	6.255e-05	0.401474
CPS1	25	1.718e-05	0.388547
CENPB	25	3.616e-05	0.39726
WDFY3	25	8.266e-05	0.38981
EGLN3	25	5.841e-05	0.370149
GLRX3	25	0.00011798	0.400981
TCHP	25	4.575e-05	0.366901
PPP1R9B	25	3.05e-05	0.385341
MAPK8IP1	25	6.453e-05	0.388967
RNF40	25	3.877e-05	0.414143
NUP85	25	5.25e-05	0.410315
XRCC4	25	3.212e-05	0.376033
HIP1R	25	4.13e-05	0.406328
UMPS	25	0.00016205	0.384764
NRP1	25	0.00043488	0.366901
TUBB8	25	0.00017488	0.376151
NCAPG	25	5.457e-05	0.413096
NR2C1	25	5.71e-06	0.376979
TNFAIP1	25	4.998e-05	0.393349
THOP1	25	6.686e-05	0.395992
TF	25	0.00042376	0.398316
SMARCD3	25	2.28e-05	0.380006
SLC1A5	25	7.061e-05	0.408729
OCLN	25	0.00017775	0.377969
SNTA1	25	0.00053092	0.365484
SCYL2	25	5.057e-05	0.413476
PEX5	25	0.00013452	0.386667
PTGS2	25	0.00016086	0.401519
MAP1S	25	5.326e-05	0.392319
HEATR1	25	4.48e-05	0.402282
PPP1R10	25	0.00013966	0.410784
NFYA	25	2.46e-05	0.410034
RAB8B	25	3.537e-05	0.399334
[truncated: 1,607 more rows]
